# Supplementary material for: The modulatory effects of gut microbes and metabolites on blood–brain barrier integrity and brain function in sepsis-associated encephalopathy
Source: PubMed Central journal article supplement (PMC10064995; doi:10.7717/peerj.15122), 2023-03-28

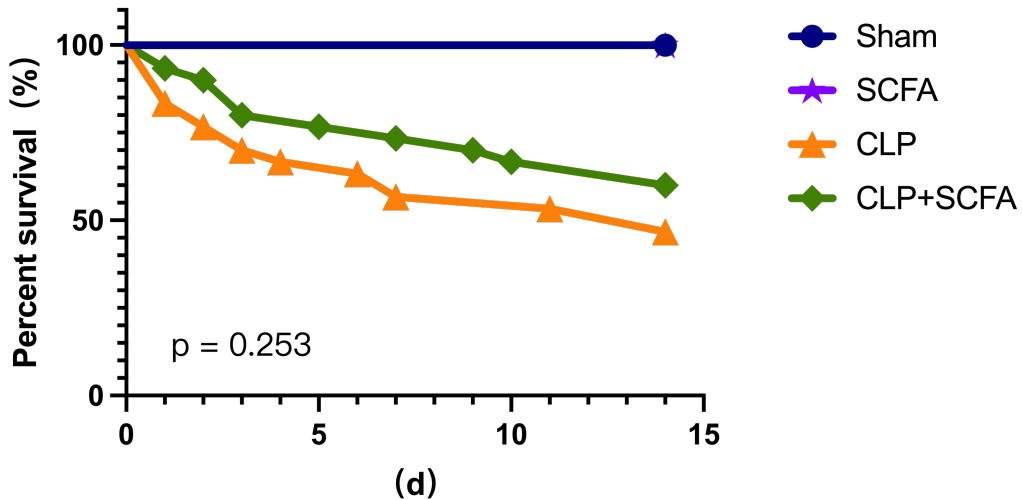

Supplement: peerj-11-15122-s003.pdf [file peerj-11-15122-s003.pdf]
