# Supplementary material for: The modulatory effects of gut microbes and metabolites on blood–brain barrier integrity and brain function in sepsis-associated encephalopathy
Source: PeerJ journal article supplement (doi:10.7717/peerj.15122), 2023-03-28
Supplement: Samples_without_C1.zip [file Genus.pdf › Samples without C1/Genus.pdf]

Genus

Relative Abundance(%)

Log2(sham-vs-clp)

P-value/FDR

Mitochondria  
Rodentibacter  
Acetivibrio\_ethanolgignens  
Candidatus\_Soleaferrea  
Ruminococcus\_torques  
Acinetobacter  
Catenibacillus  
Lachnospiraceae\_UCG\_010  
Christensenellaceae\_R\_7  
Prevotellaceae\_NK3B31  
Blautia  
Escherichia\_Shigella  
Elusimicrobium  
Eubacterium\_brachy  
Alloprevotella  
Bacteroides  
Prevotellaceae\_UCG\_001  
Lachnospiraceae\_UCG\_006  
Eubacterium\_nodatum  
Tuzzerella  
Phascolarctobacterium  
Clostridia\_vadinBB60  
Colidextribacter  
Negativibacillus  
Alistipes  
Butyricicoccus  
Lachnospiraceae\_FCS020  
Romboutsia  
Streptococcus  
Staphylococcus  
Parasutterella  
Lactobacillus  
Aerococcus  
Aeromonas  
Clostridioides  
Enterococcus  
Anaerovorax  
Eubacterium\_ventriosum  
Treponema  
Erysipelatoclostridium  
Odoribacter  
Eubacterium\_coprostanoligenes  
Lachnoclostridium  
Mycoplasma  
Roseburia  
Marvinbryantia  
Prevotella  
Paraprevotella  
Harryflintia  
Clostridium  
Holdemania  
Defluviitaleaceae\_UCG\_011  
Anaerostipes  
Muribaculum  
Anaerotruncus  
Corynebacterium  
Erysipelotrichaceae\_UCG\_003  
Akkermansia  
Butyricimonas  
Prevotellaceae\_Ga6A1  
Anaeroplasm  
Lachnospiraceae\_NK4A136  
Papillibacter  
Rikenella  
Peptococcus  
Muribaculaceae  
Lachnospiraceae\_UCG\_001  
Eubacterium\_siraeum

0 5 10 15 20

-5 0 5

0.1 0.2 0.3 0.4

Relative Abundance(%)

sham  
clp

Log2(sham-vs-clp)

up  
dw

P-value/FDR

P\_Value  
FDR
