# Supplementary material for: The modulatory effects of gut microbes and metabolites on blood–brain barrier integrity and brain function in sepsis-associated encephalopathy
Source: PeerJ journal article supplement (doi:10.7717/peerj.15122), 2023-03-28
Supplement: Samples_without_C1.zip [file Lefse_sham-clp.result.cladogram.pdf › Samples without C1/Lefse_sham-clp.result.cladogram.pdf]

# Cladogram

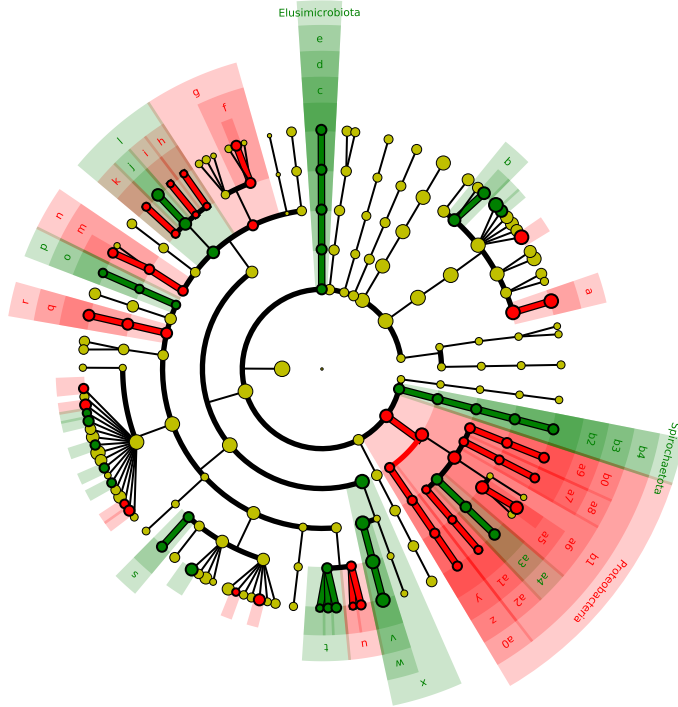

- |                              |                         |
|------------------------------|-------------------------|
| a: Bacteroidaceae            | v: Acidaminococcaceae   |
| b: Rikenellaceae             | w: Acidaminococcales    |
| c: Elusimicrobiaceae         | x: Negativicutes        |
| d: Elusimicrobiales          | y: Mitochondria         |
| e: Elusimicrobia             | z: Rickettsiales        |
| f: Erysipelatoclostridiaceae | a0: Alphaproteobacteria |
| g: Erysipelotrichales        | a1: Aeromonadaceae      |
| h: Aerococcaceae             | a2: Aeromonadales       |
| i: Enterococcaceae           | a3: Sutterellaceae      |
| j: Lactobacillaceae          | a4: Burkholderiales     |
| k: Streptococcaceae          | a5: Enterobacteriaceae  |
| l: Lactobacillales           | a6: Enterobacteriales   |
| m: Staphylococcaceae         | a7: Pasteurellaceae     |
| n: Staphylococcales          | a8: Pasteurellales      |
| o: Christensenellaceae       | a9: Moraxellaceae       |
| p: Christensenellales        | b0: Pseudomonadales     |
| q: Clostridia_vadinBB60      | b1: Gammaproteobacteria |
| r: Clostridia_vadinBB60      | b2: Spirochaetaceae     |
| s: Butyricocccaceae          | b3: Spirochaetales      |
| t: Anaerovoracaceae          | b4: Spirochaetia        |
| u: Peptostreptococcaceae     |                         |
