# Supplementary figures and images for: The modulatory effects of gut microbes and metabolites on blood–brain barrier integrity and brain function in sepsis-associated encephalopathy
Source: PeerJ journal article supplement (doi:10.7717/peerj.15122), 2023-03-28

P=0.016

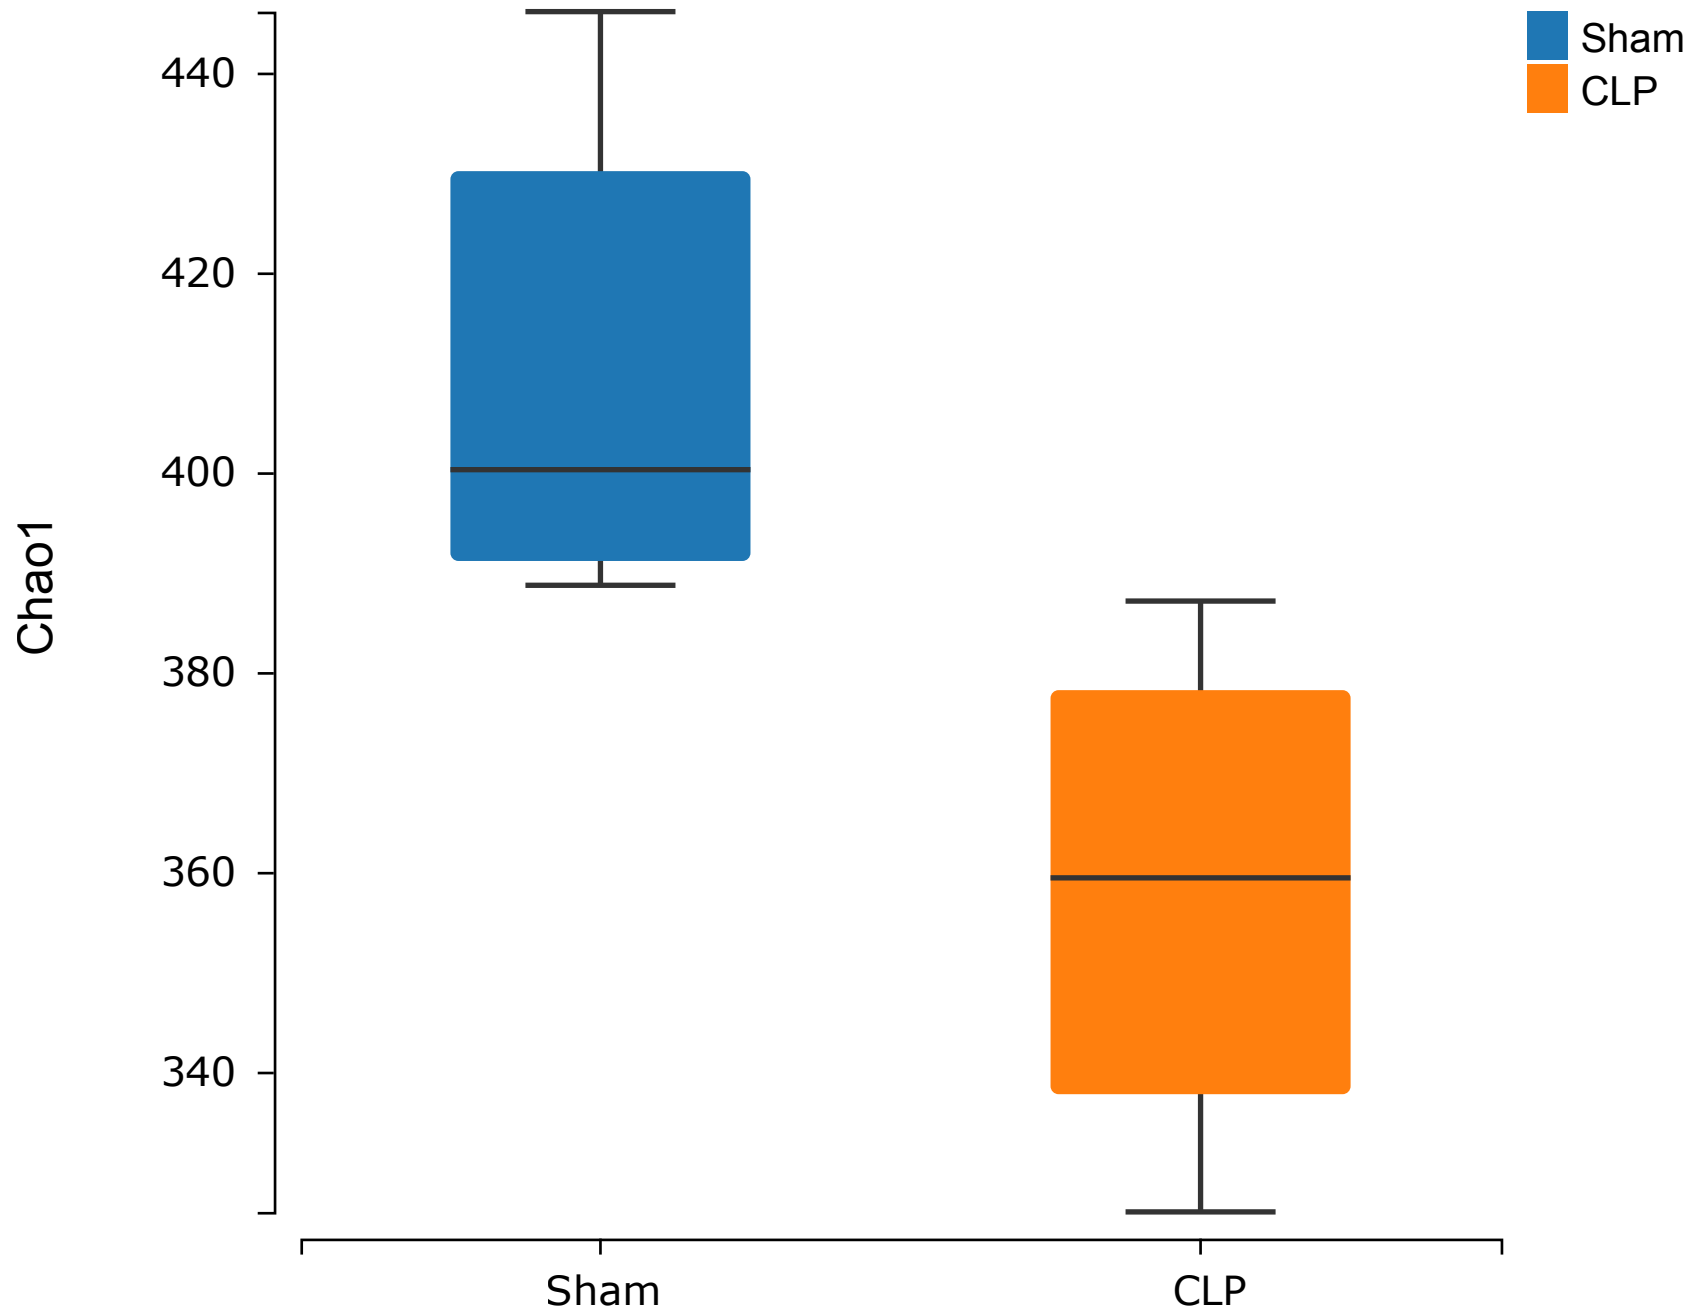

Supplement: Samples_without_C1.zip [file Chao1.pdf › Samples without C1/Chao1.pdf]

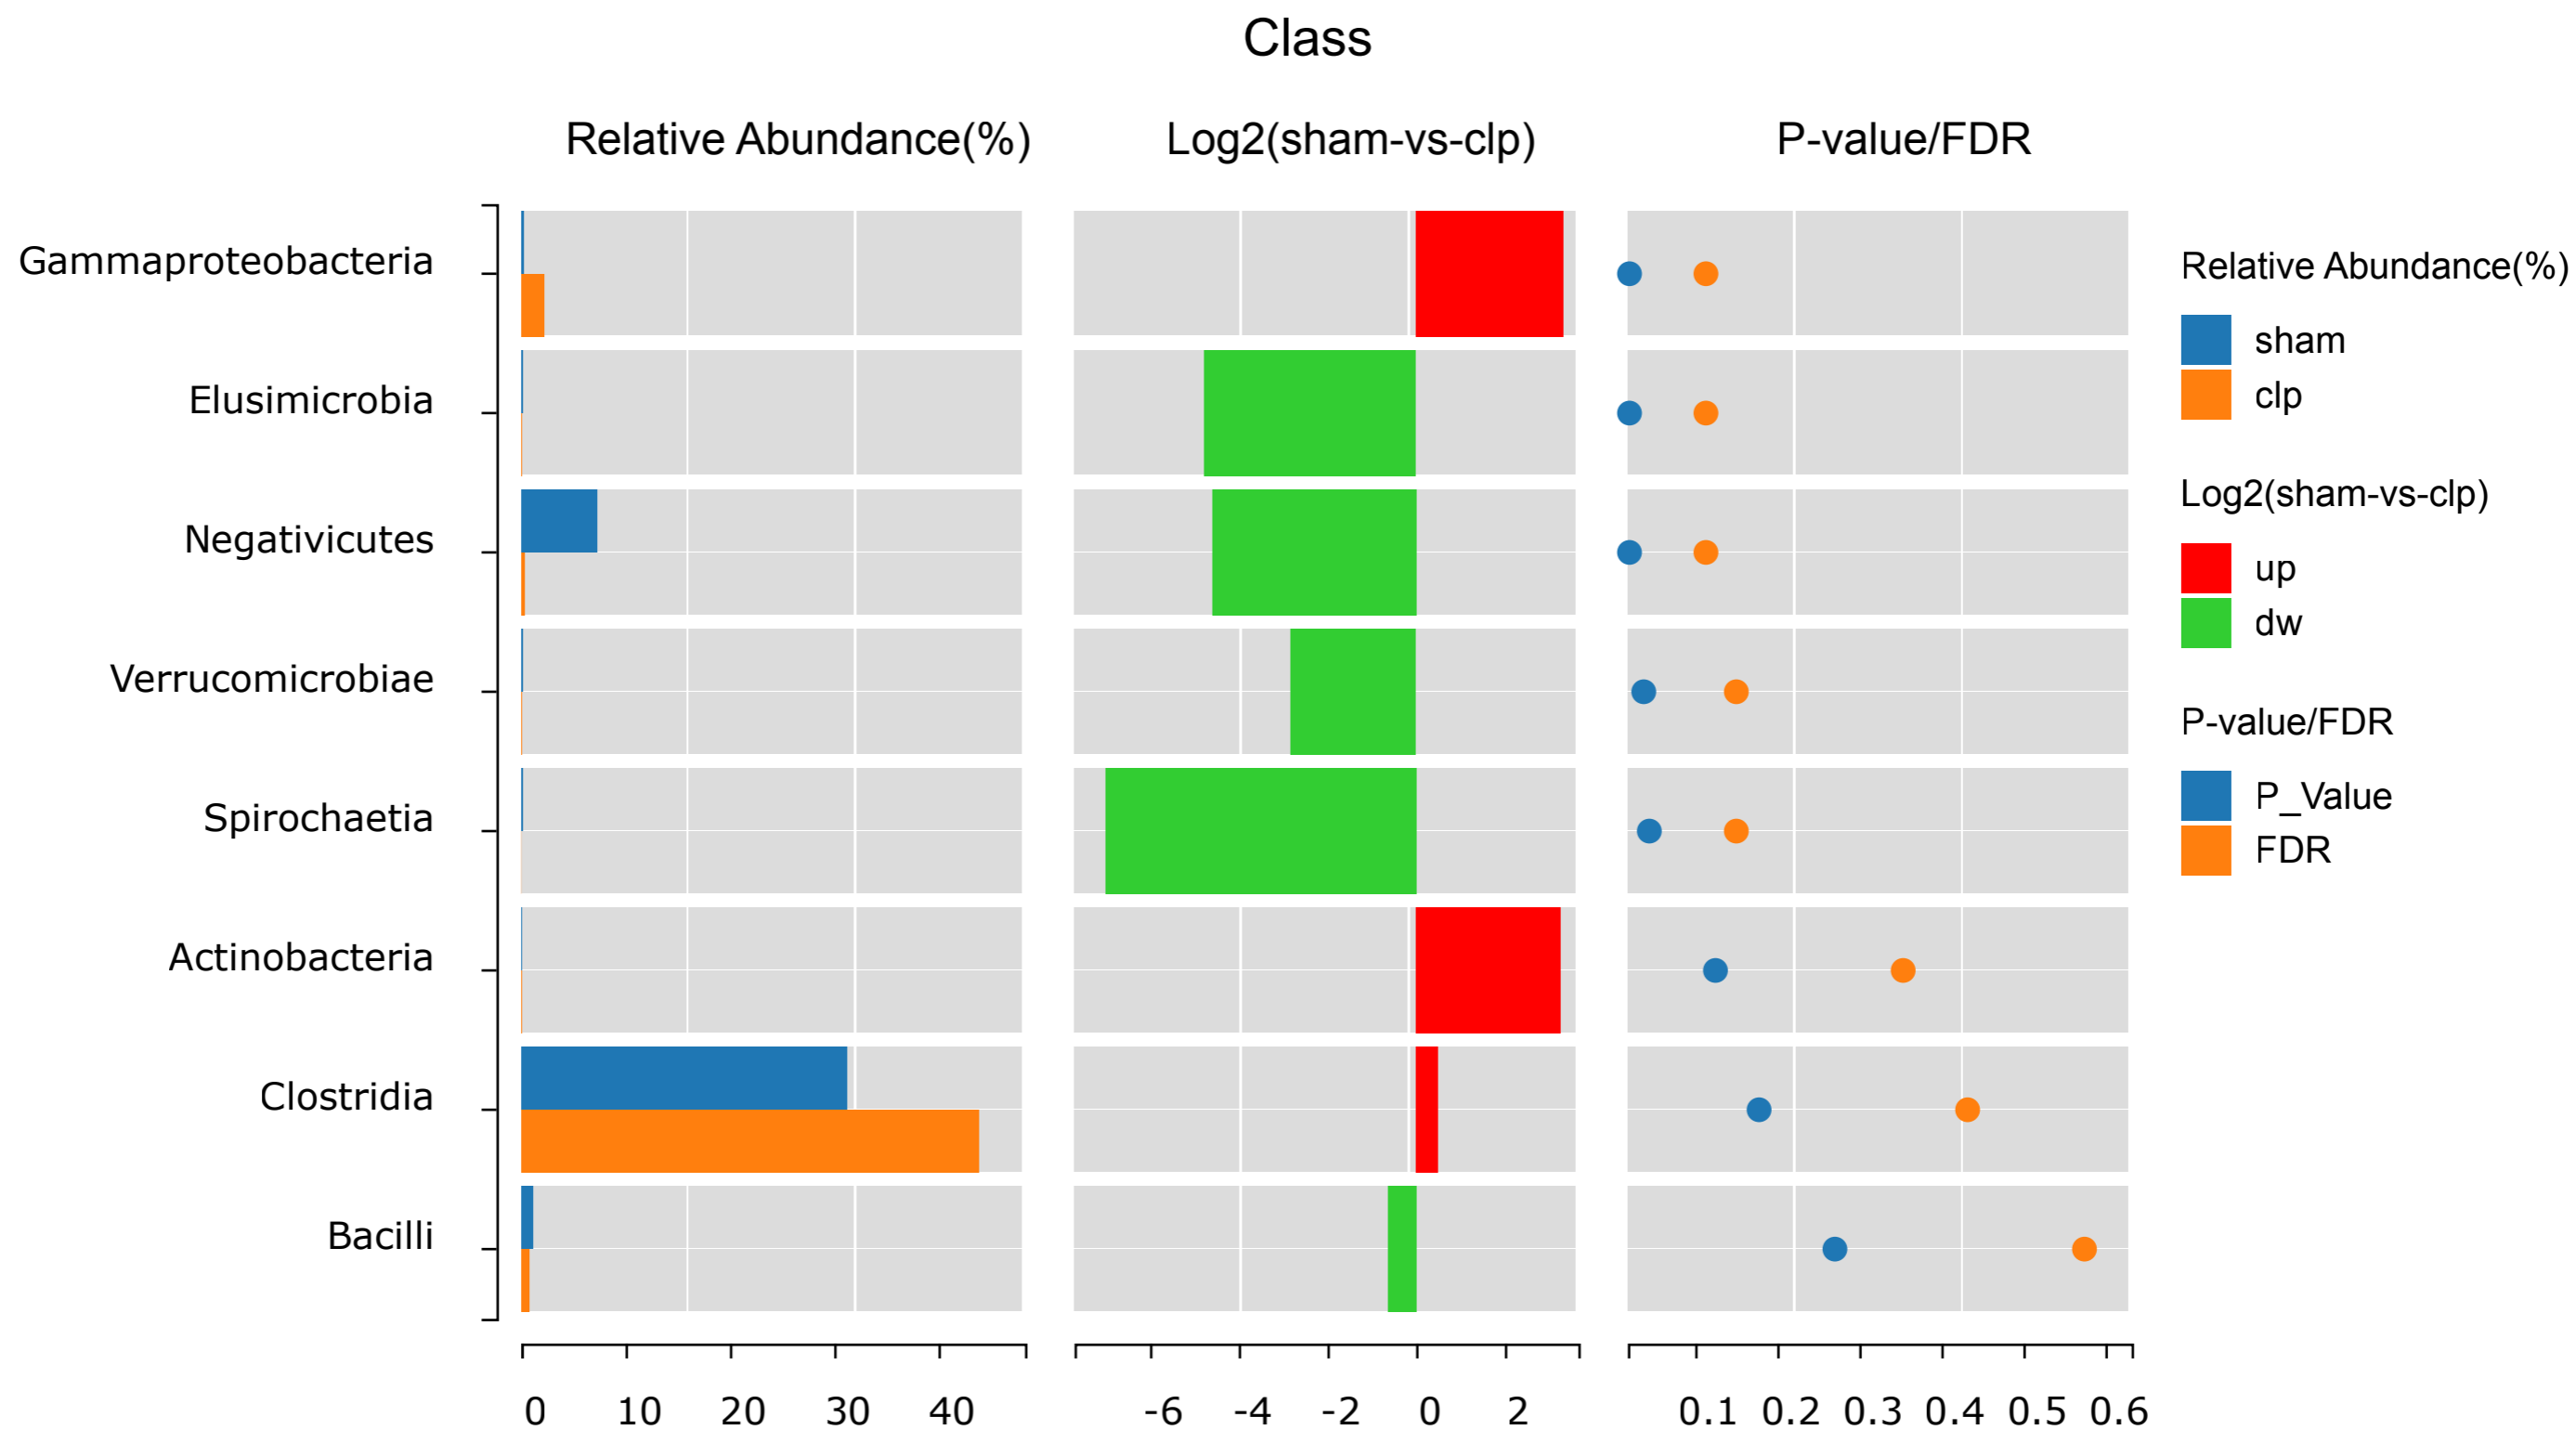

Supplement: Samples_without_C1.zip [file Class.pdf › Samples without C1/Class.pdf]

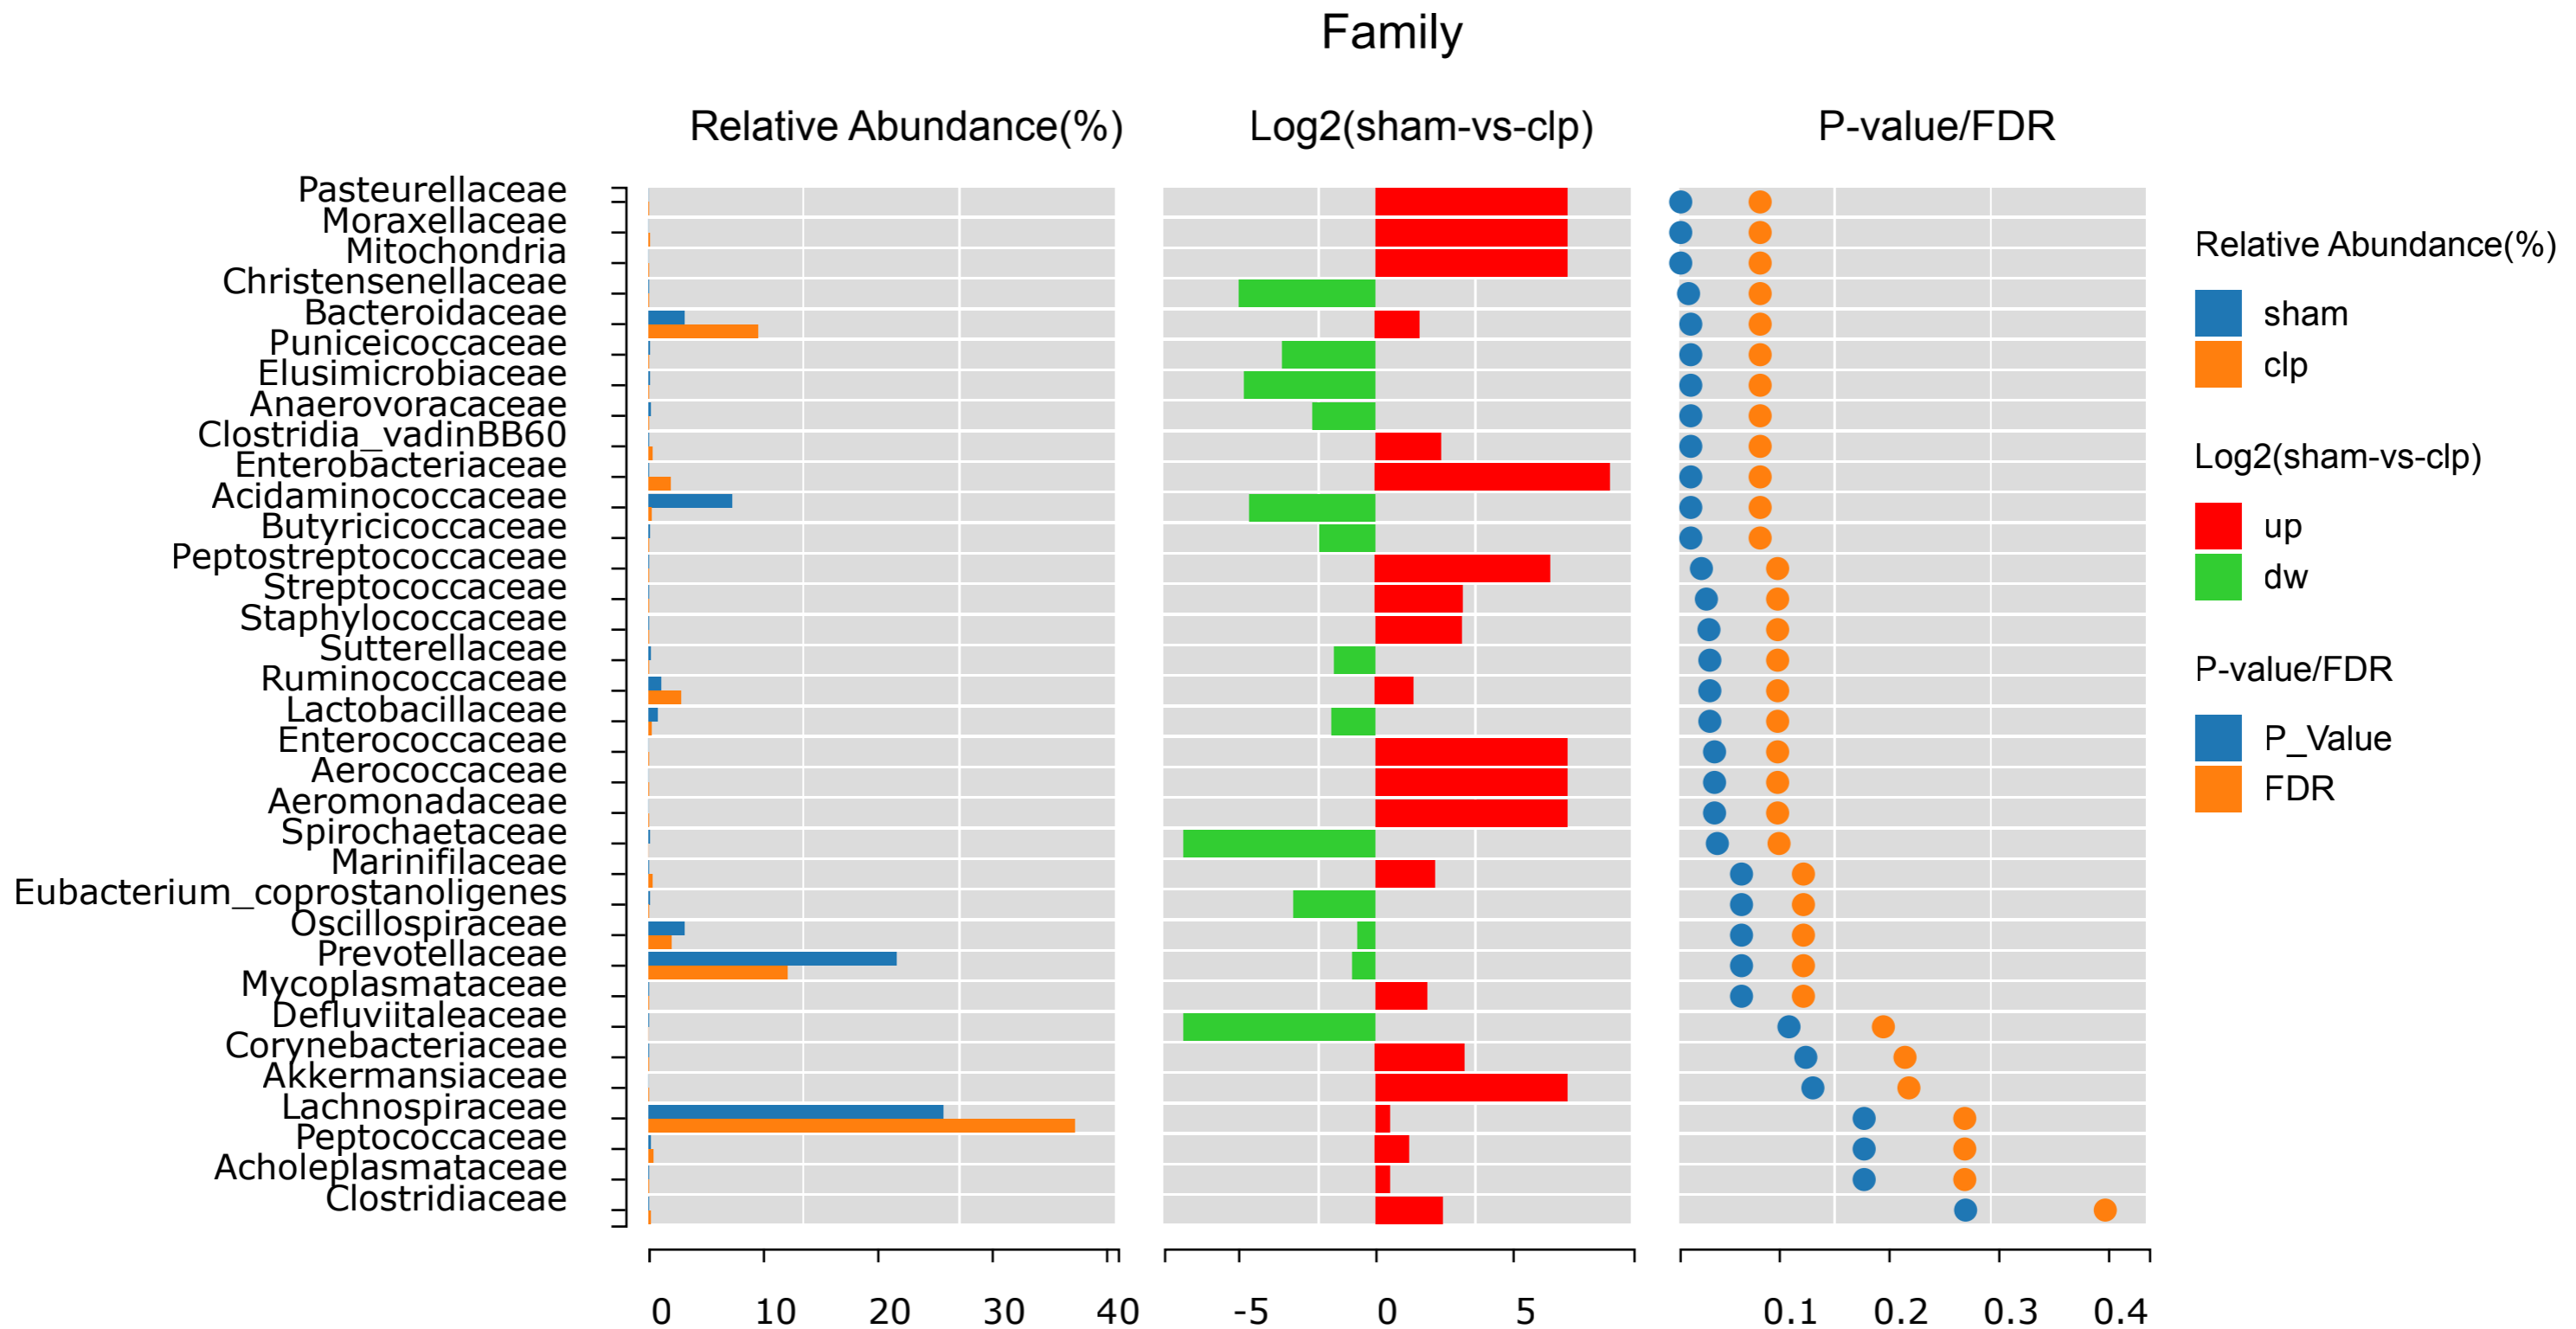

Supplement: Samples_without_C1.zip [file Family.pdf › Samples without C1/Family.pdf]

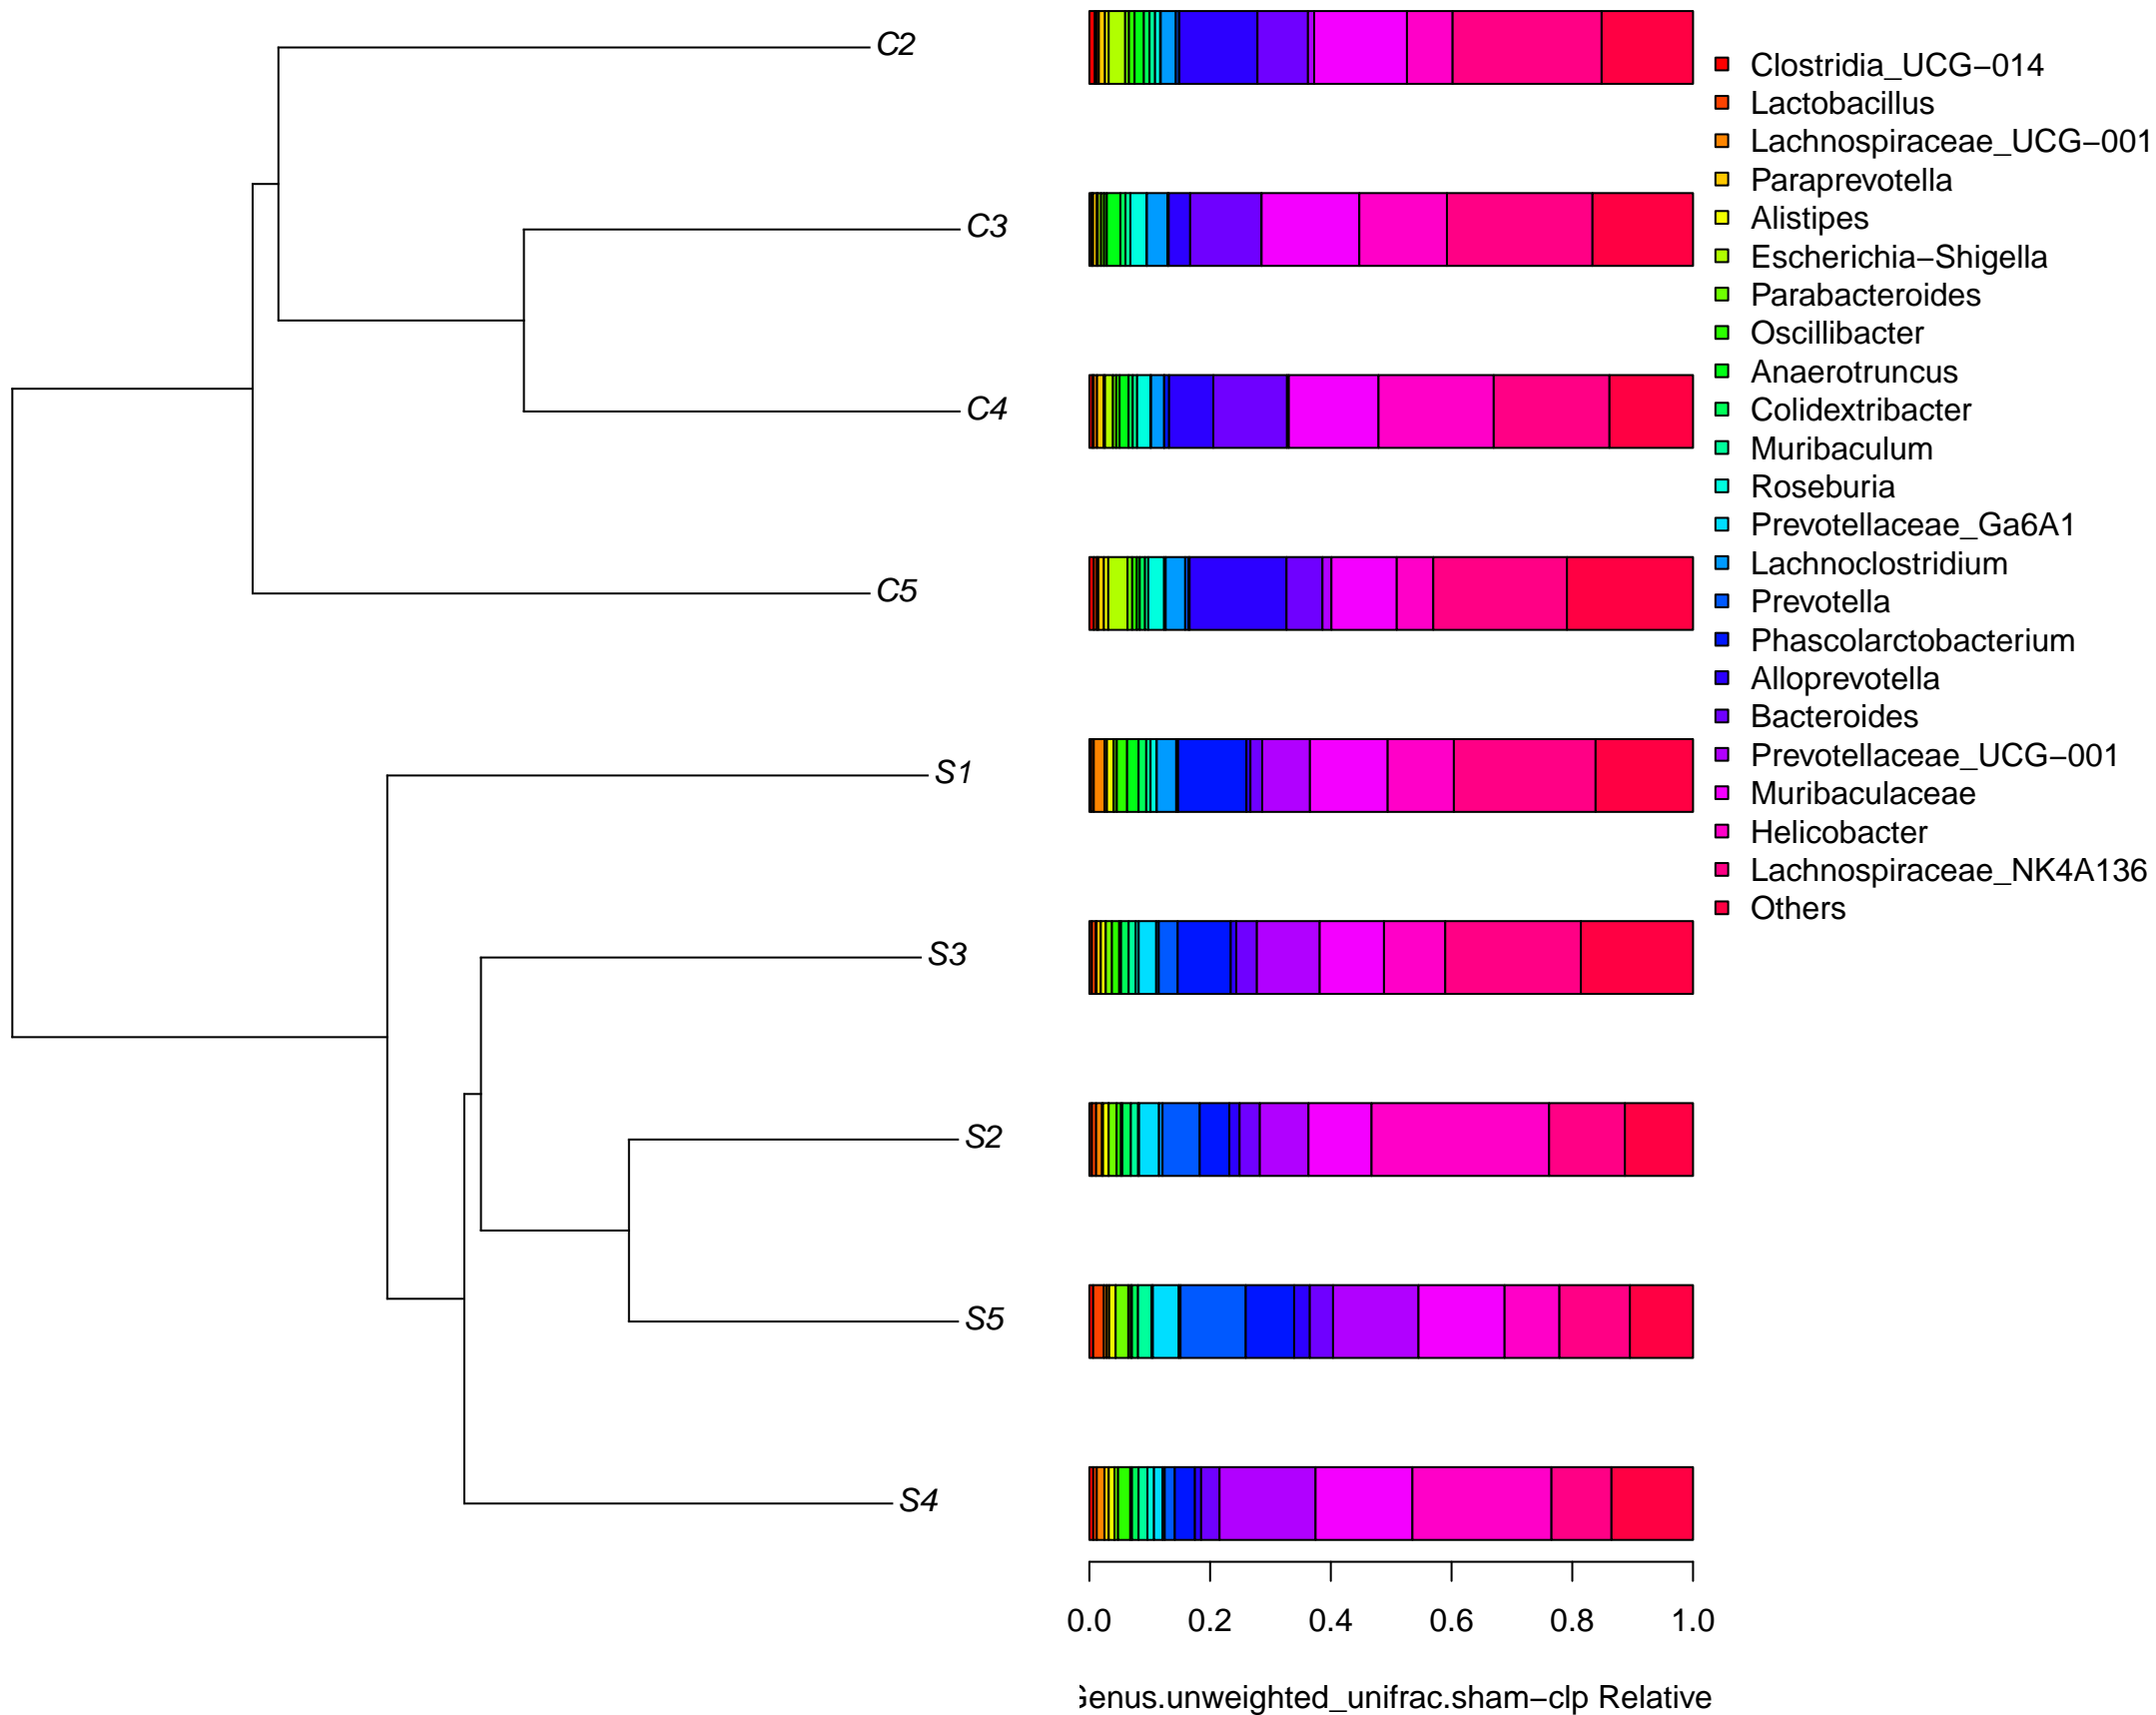

Supplement: Samples_without_C1.zip [file Genus.unweighted_unifrac.sham-clp_taxonomy_tree.pdf › Samples without C1/Genus.unweighted_unifrac.sham-clp_taxonomy_tree.pdf]

KEGG\_level2

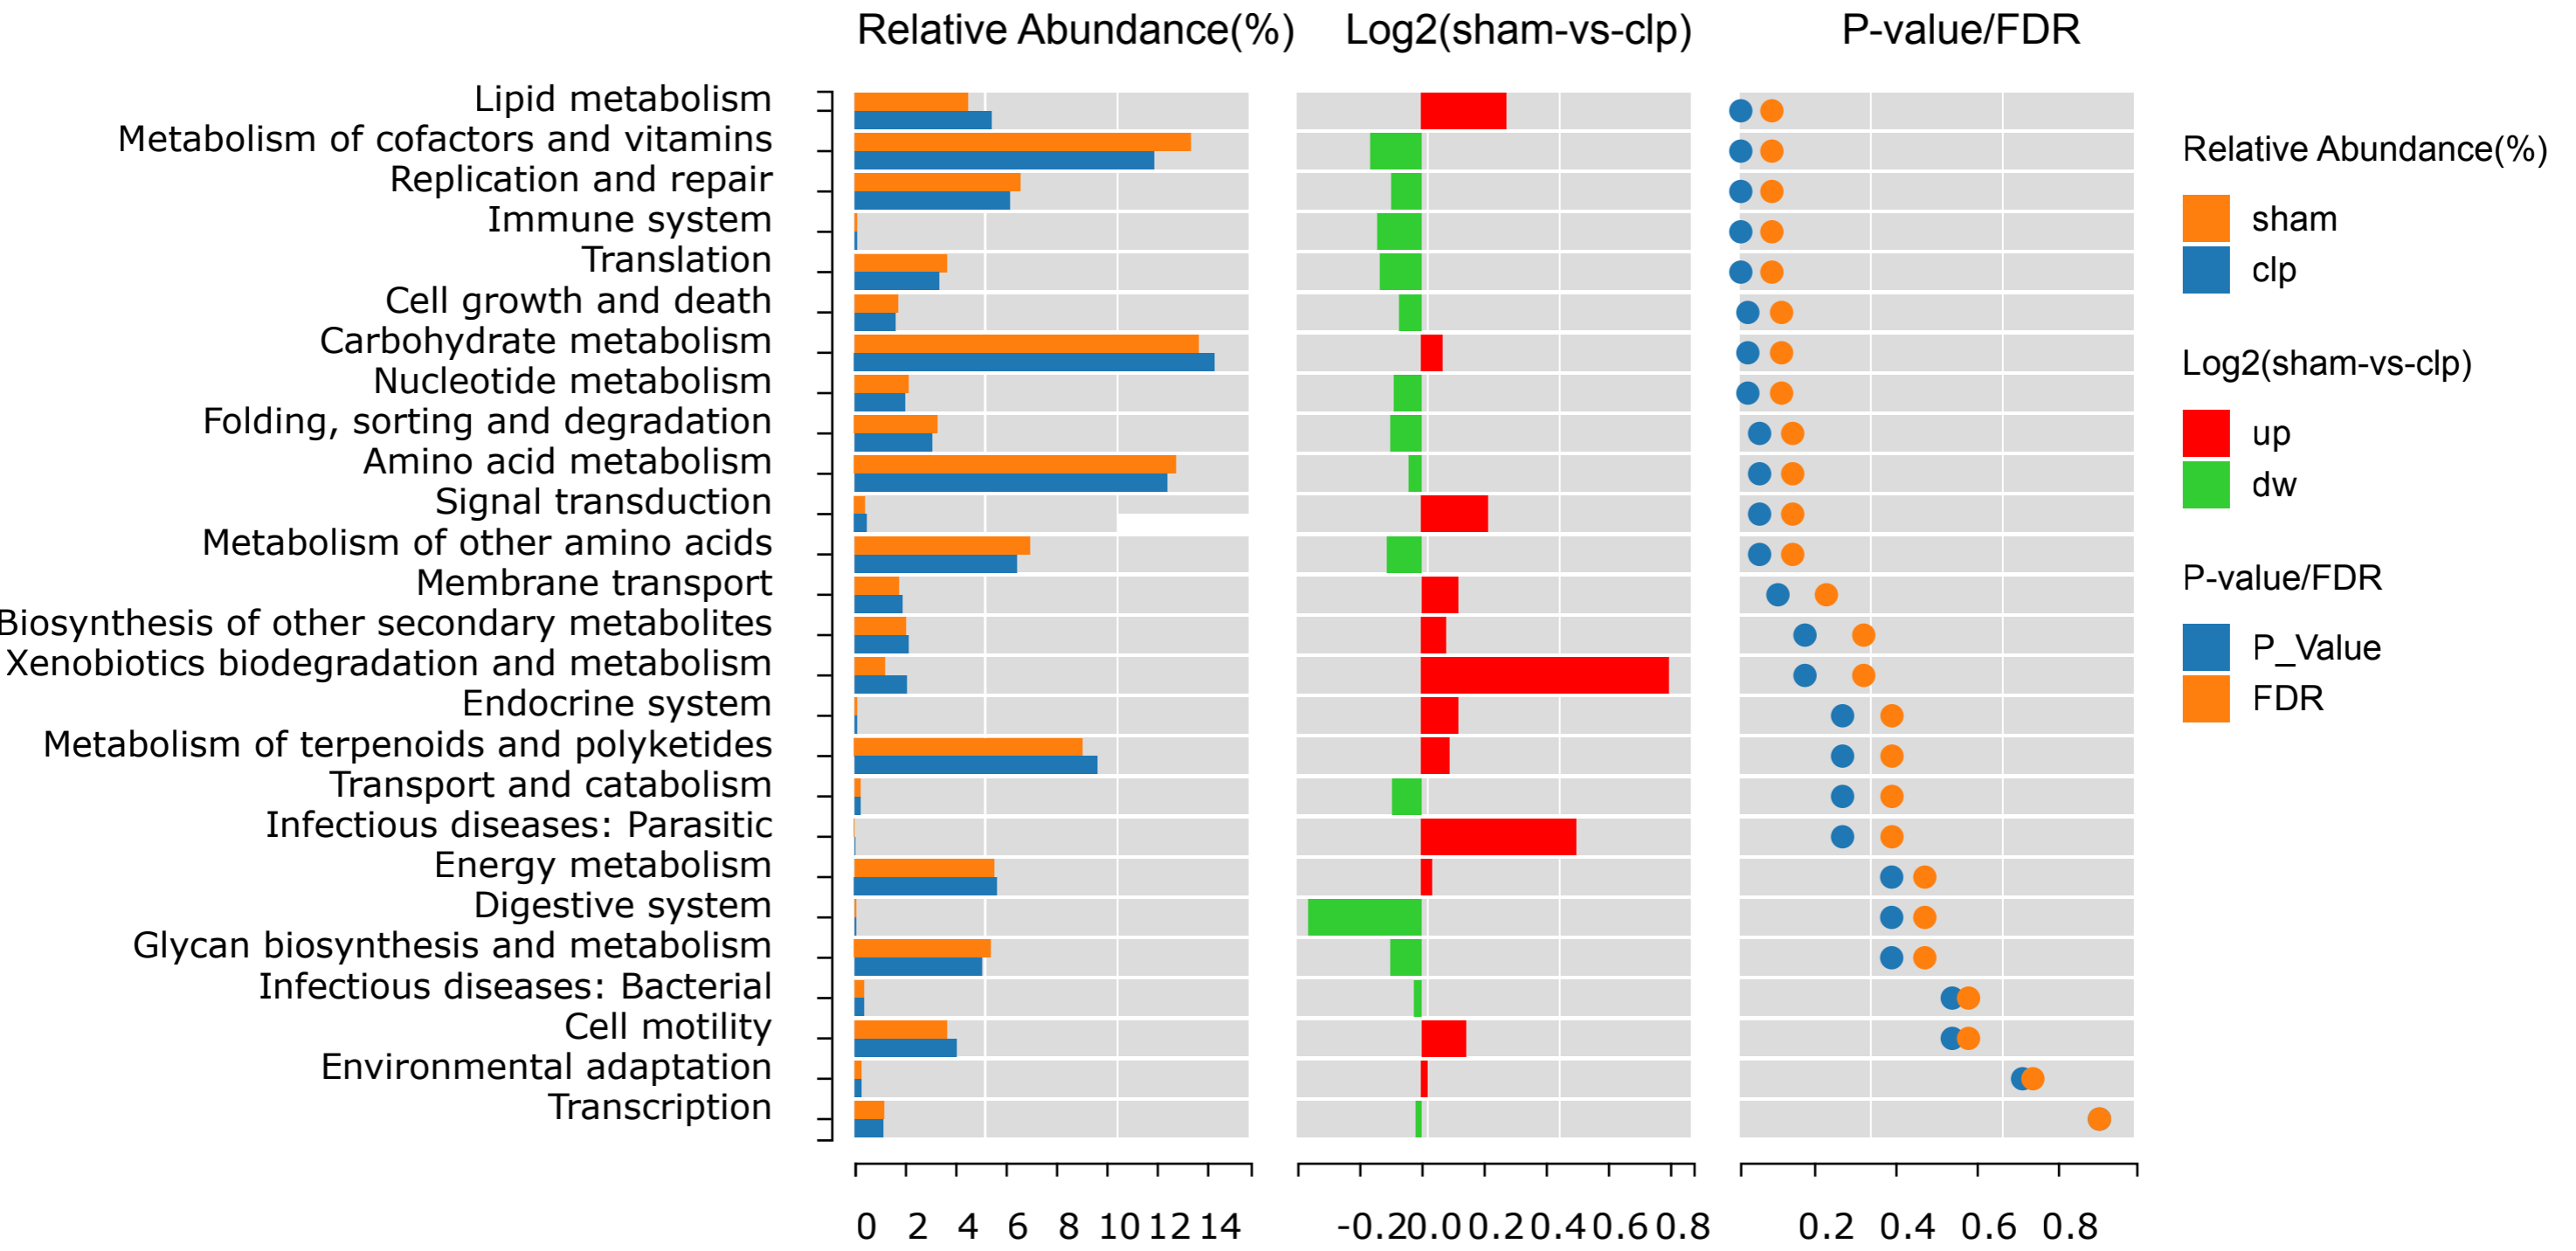

Supplement: Samples_without_C1.zip [file KEGG-level2.pdf › Samples without C1/KEGG-level2.pdf]

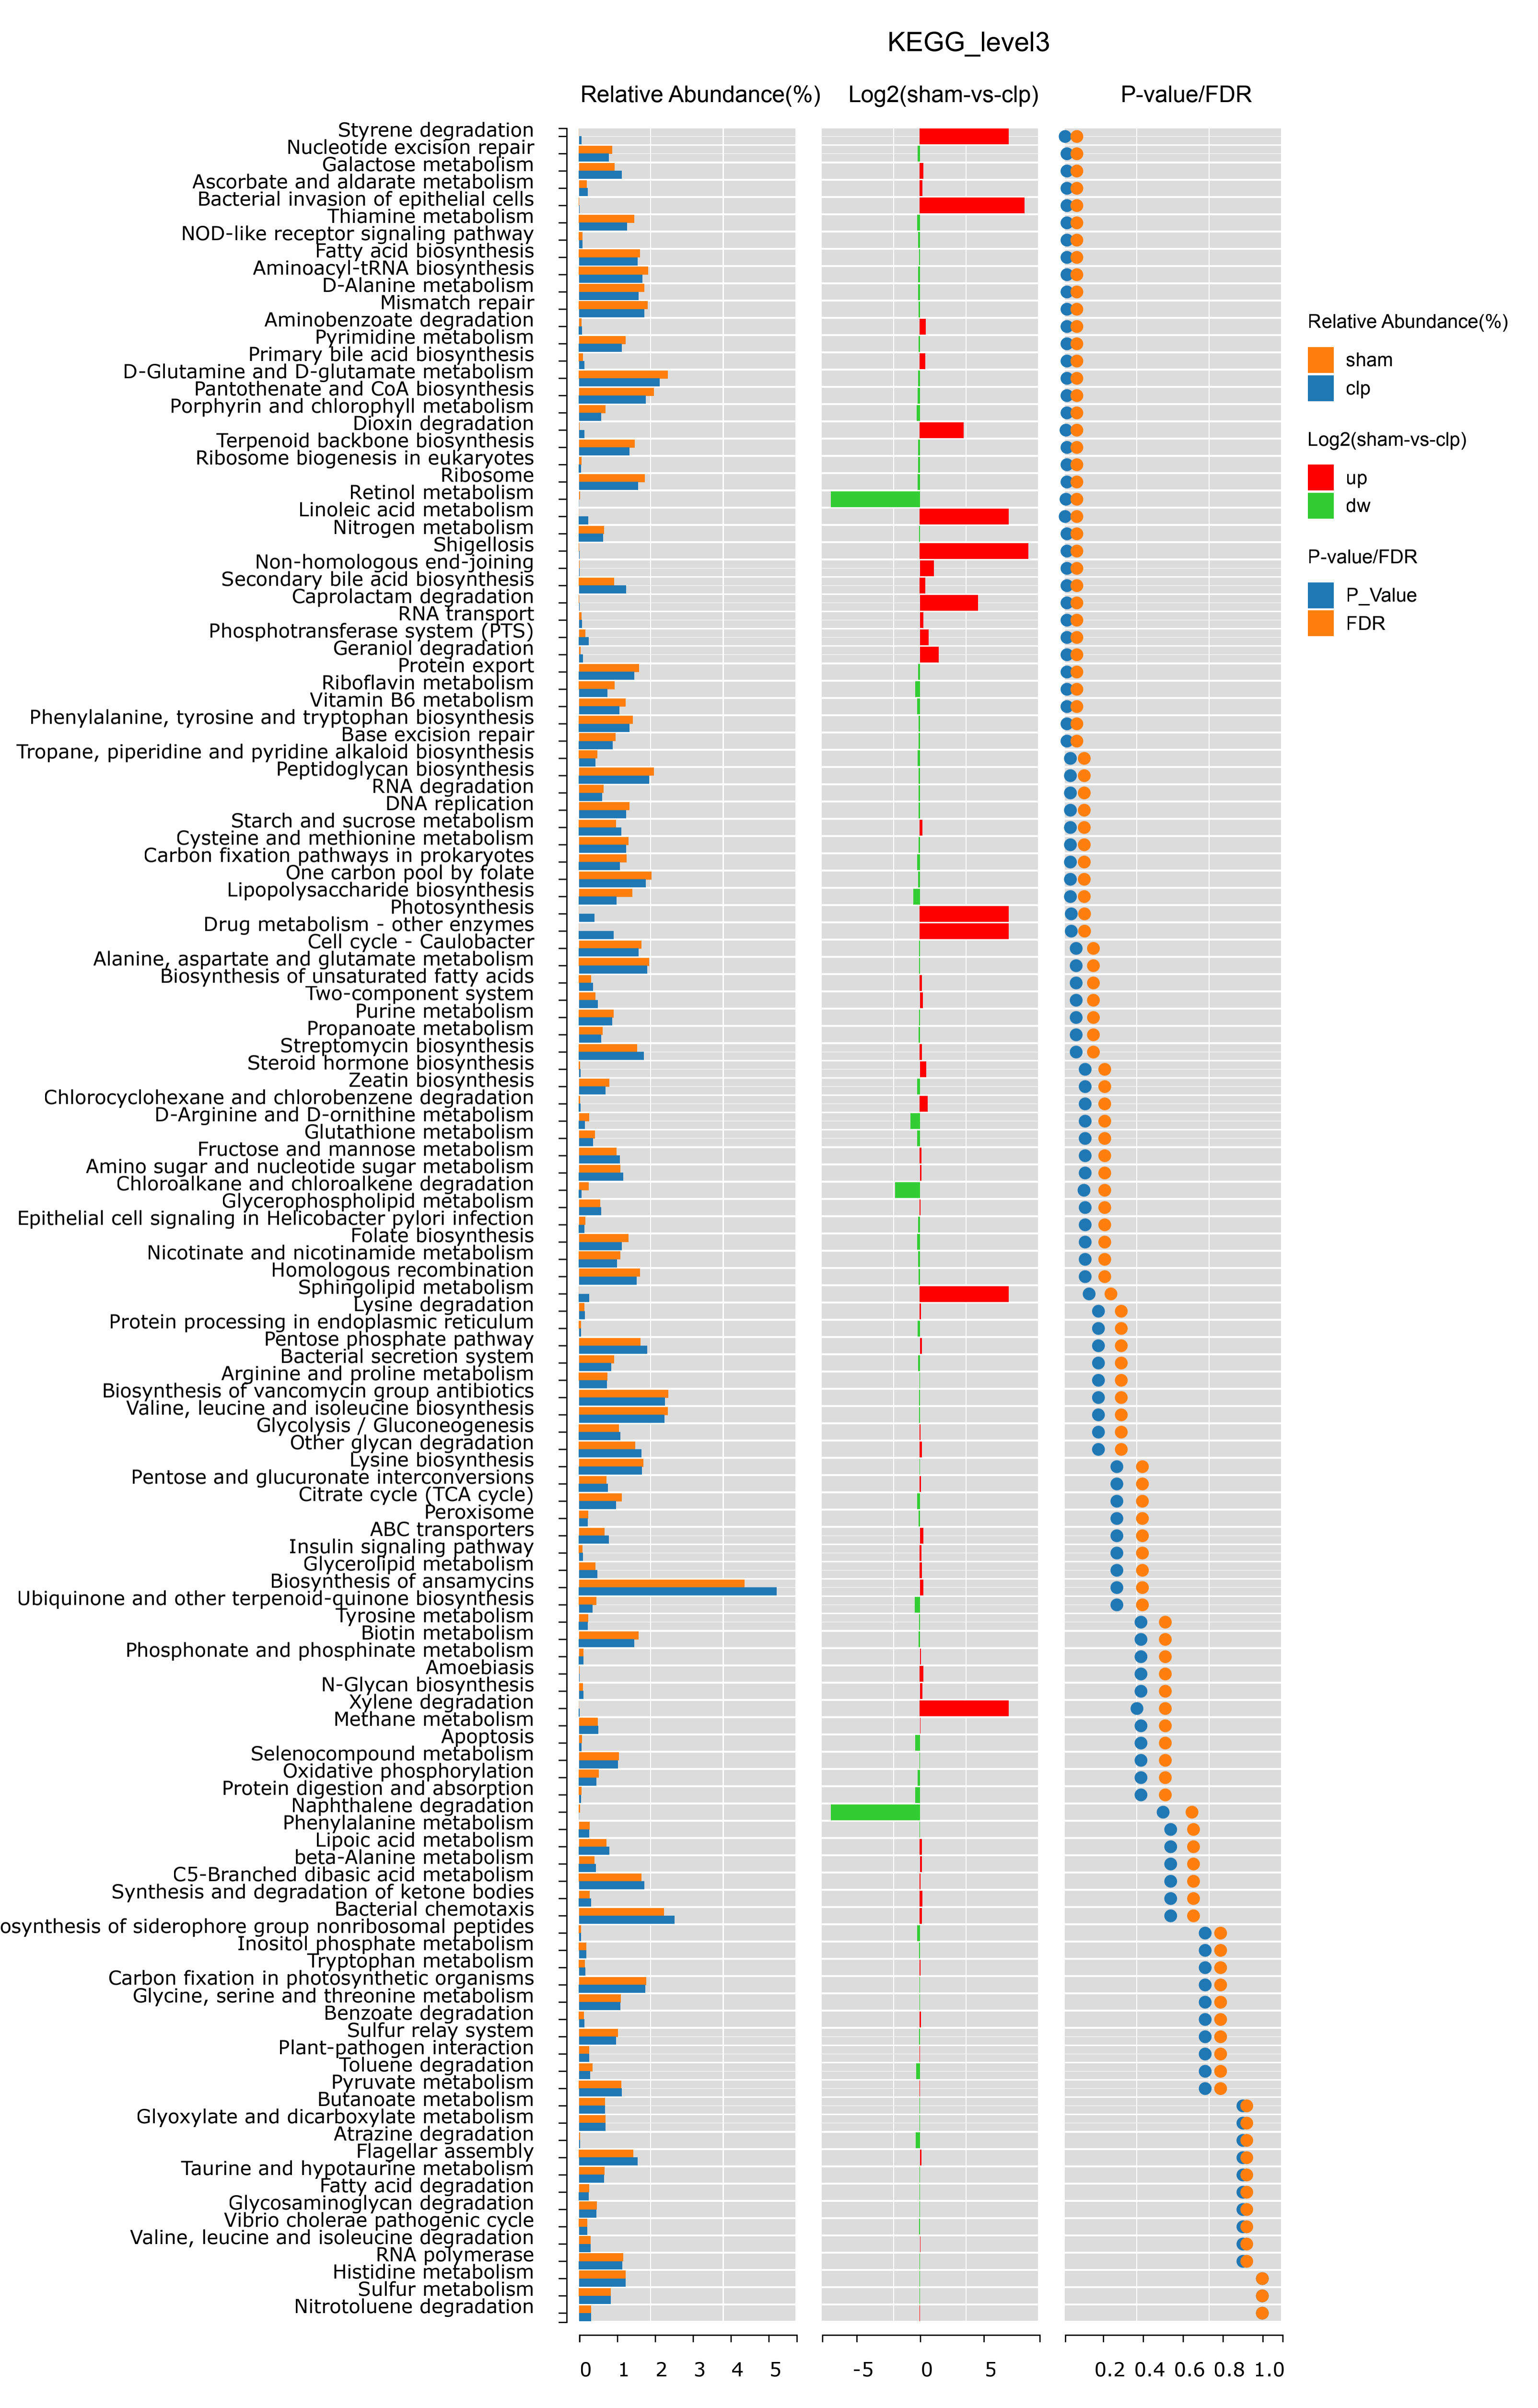

Supplement: Samples_without_C1.zip [file KEGG-level3.pdf › Samples without C1/KEGG-level3.pdf]

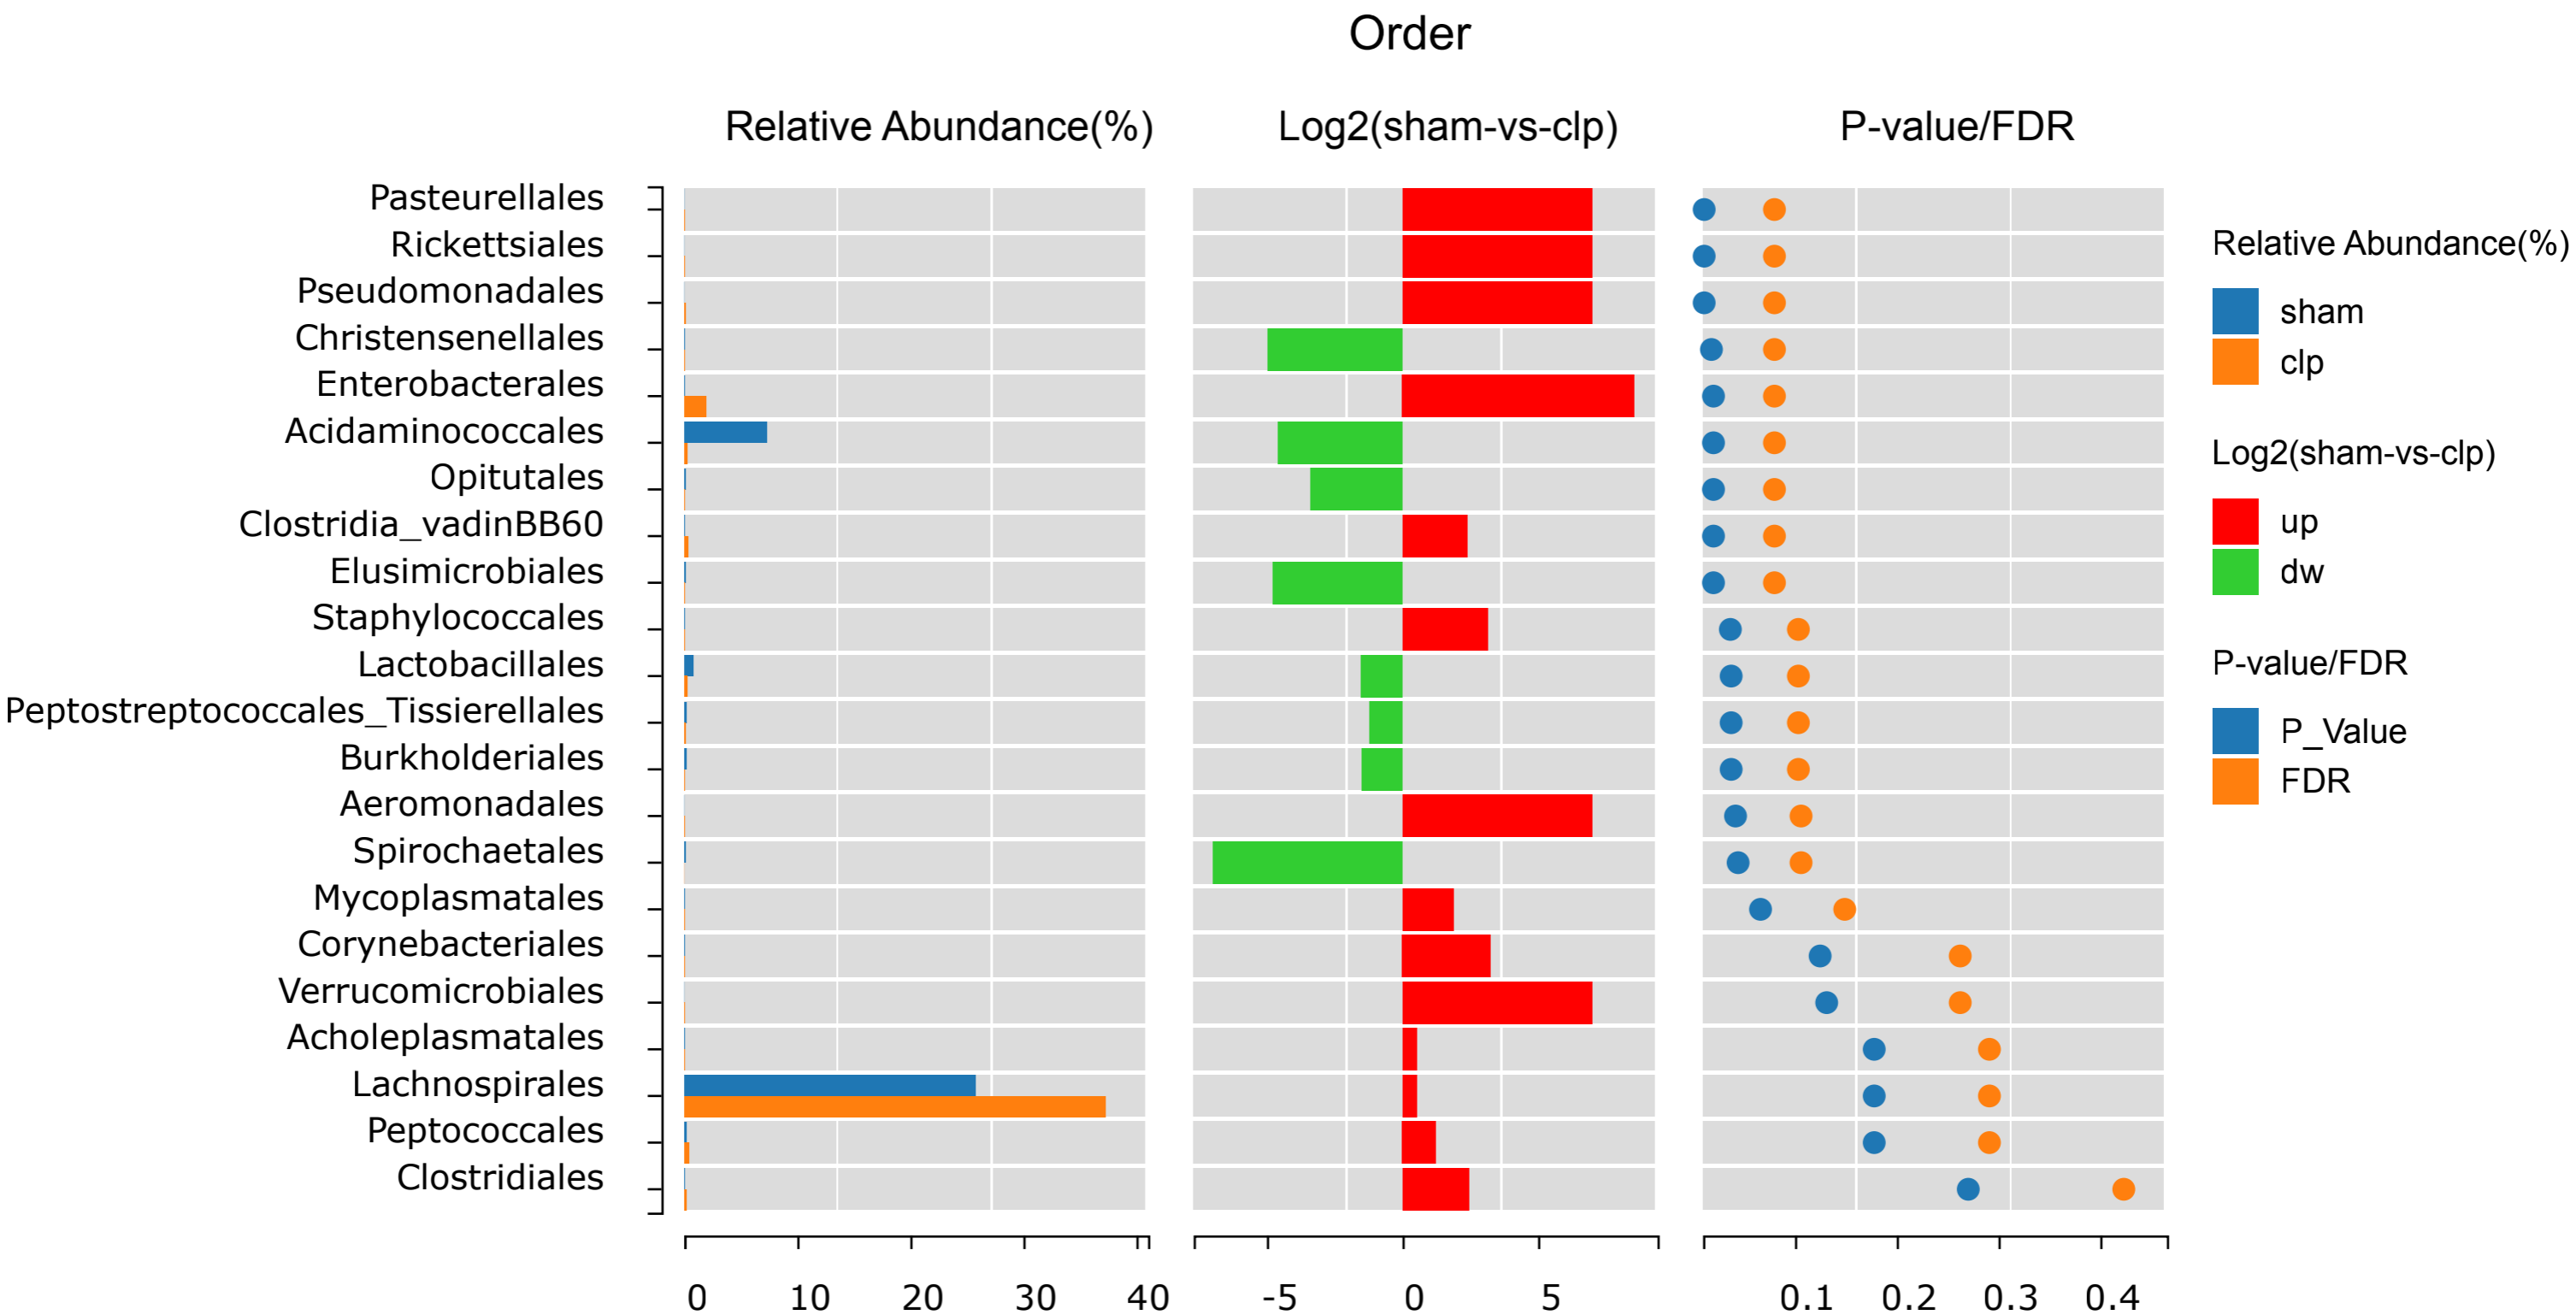

Supplement: Samples_without_C1.zip [file Order.pdf › Samples without C1/Order.pdf]

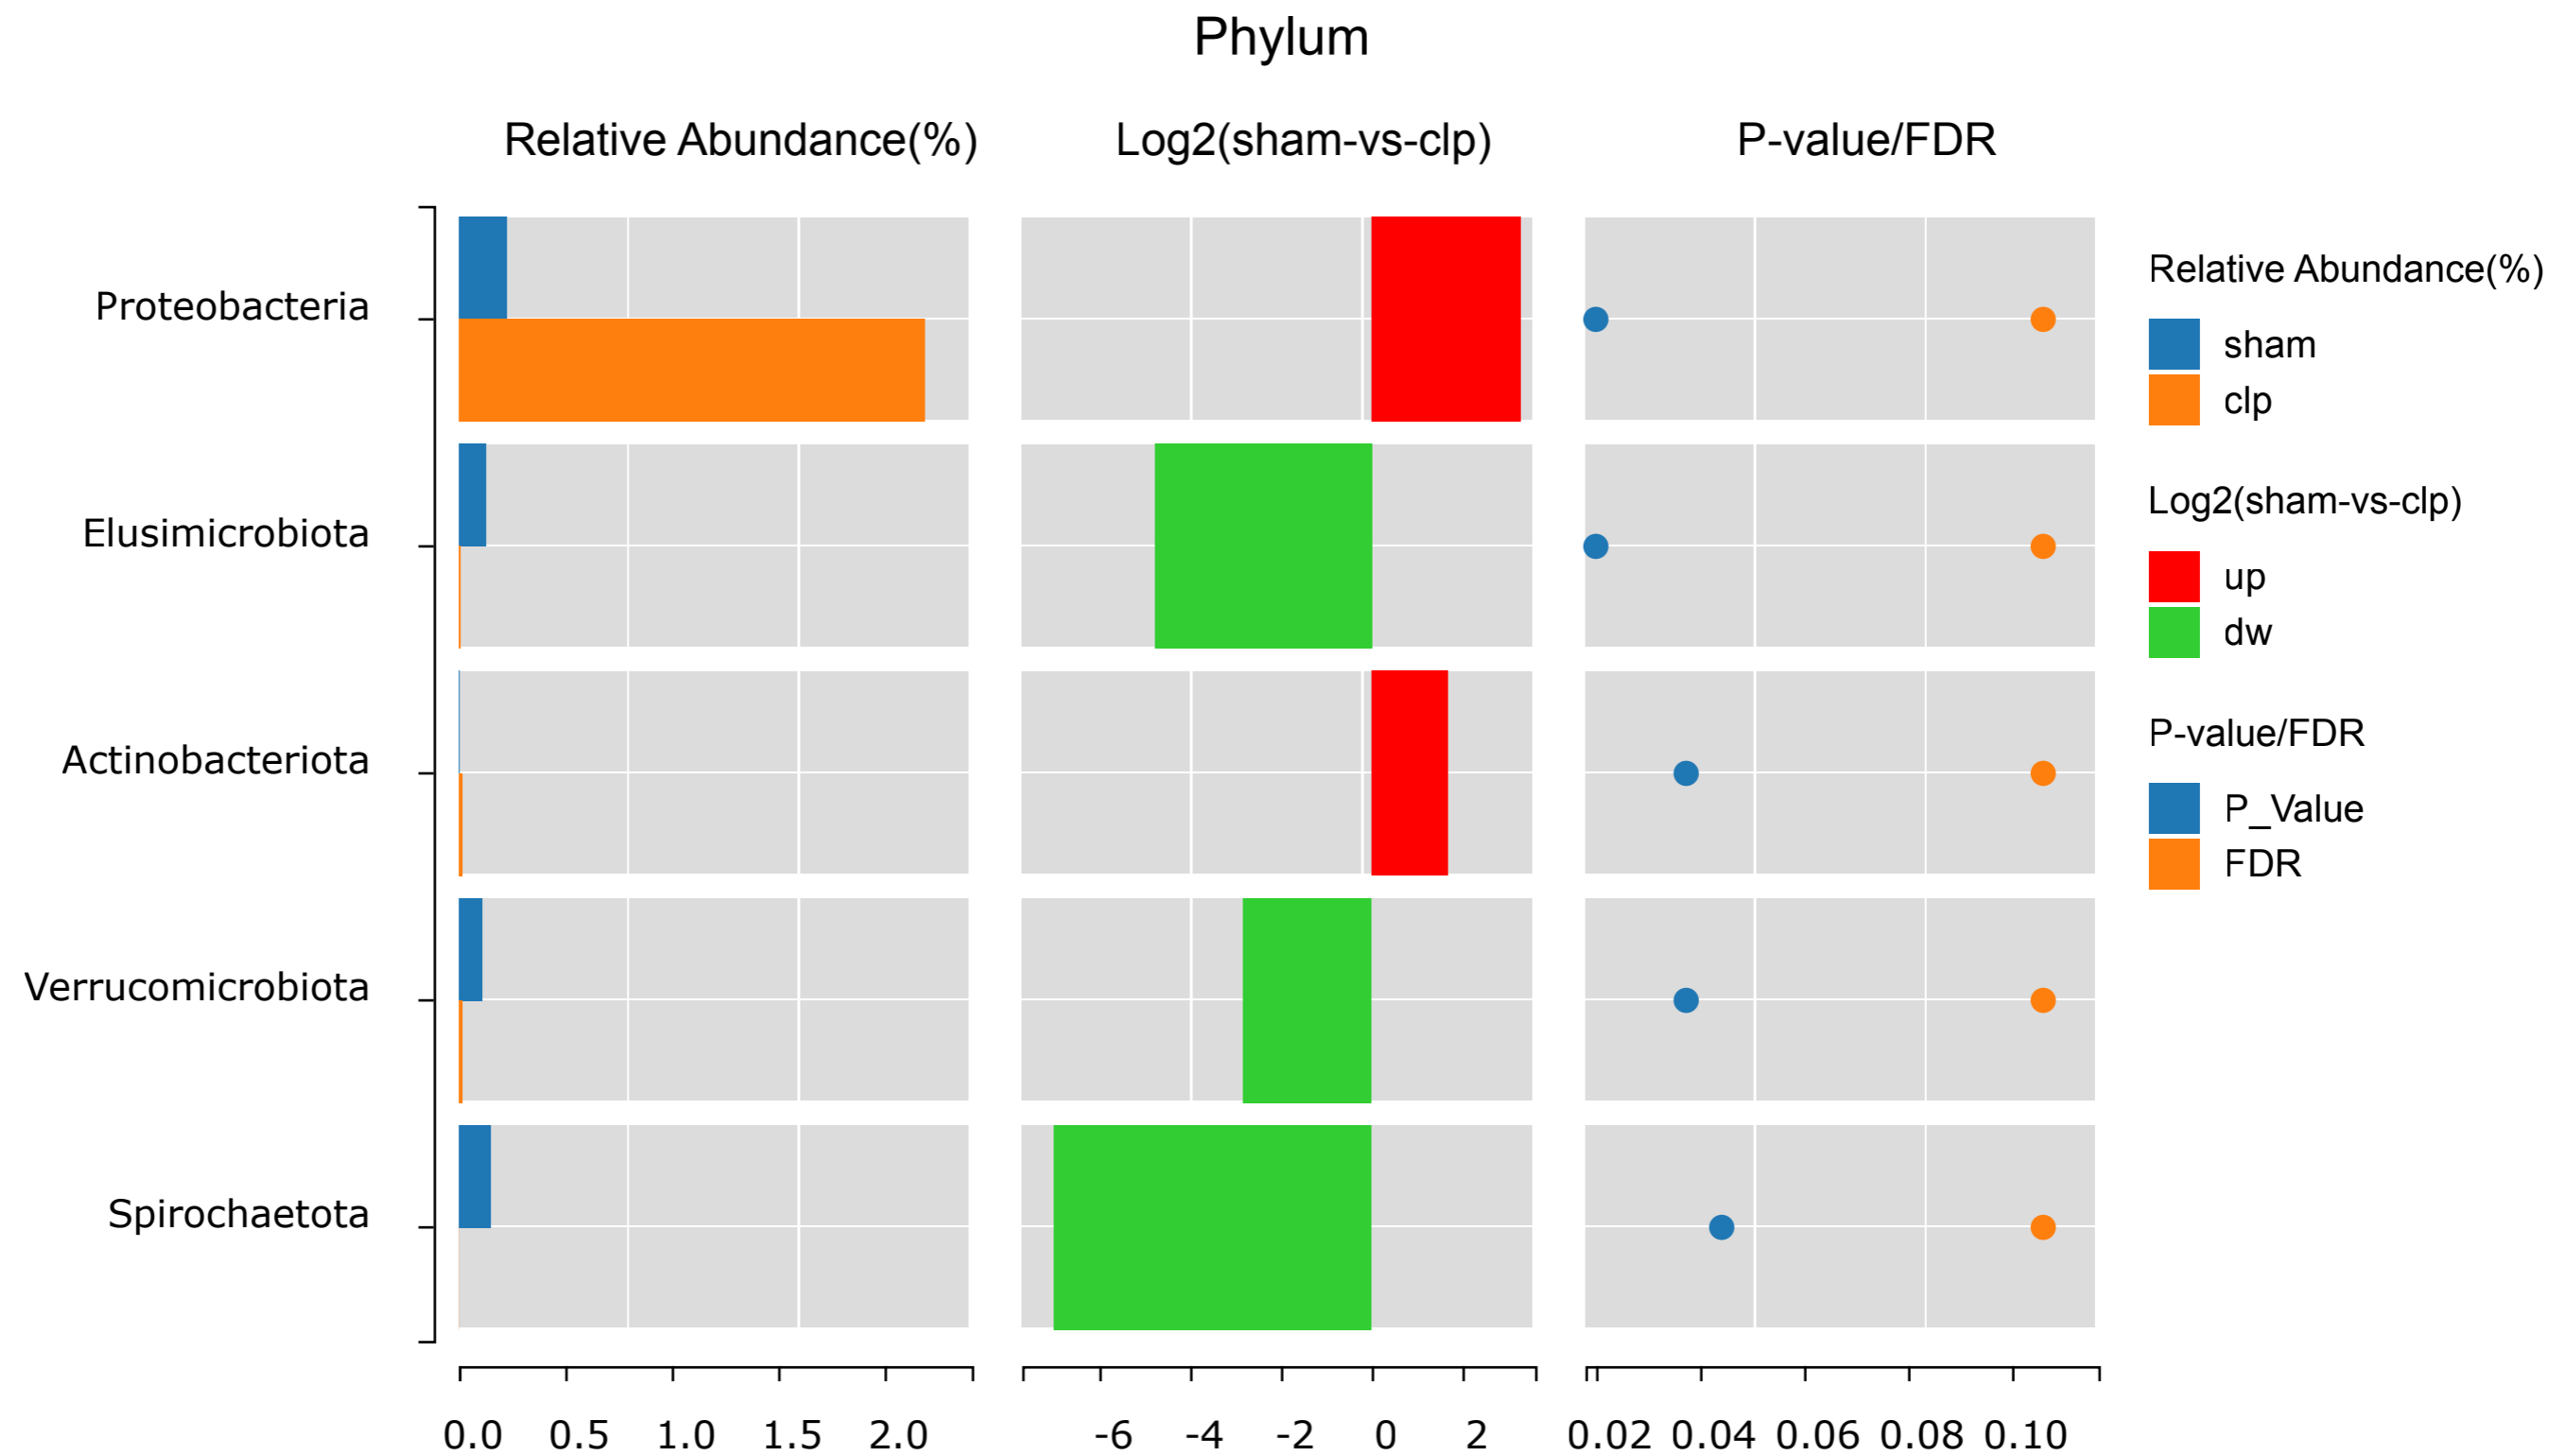

Supplement: Samples_without_C1.zip [file Phylum.pdf › Samples without C1/Phylum.pdf]

P=0.56

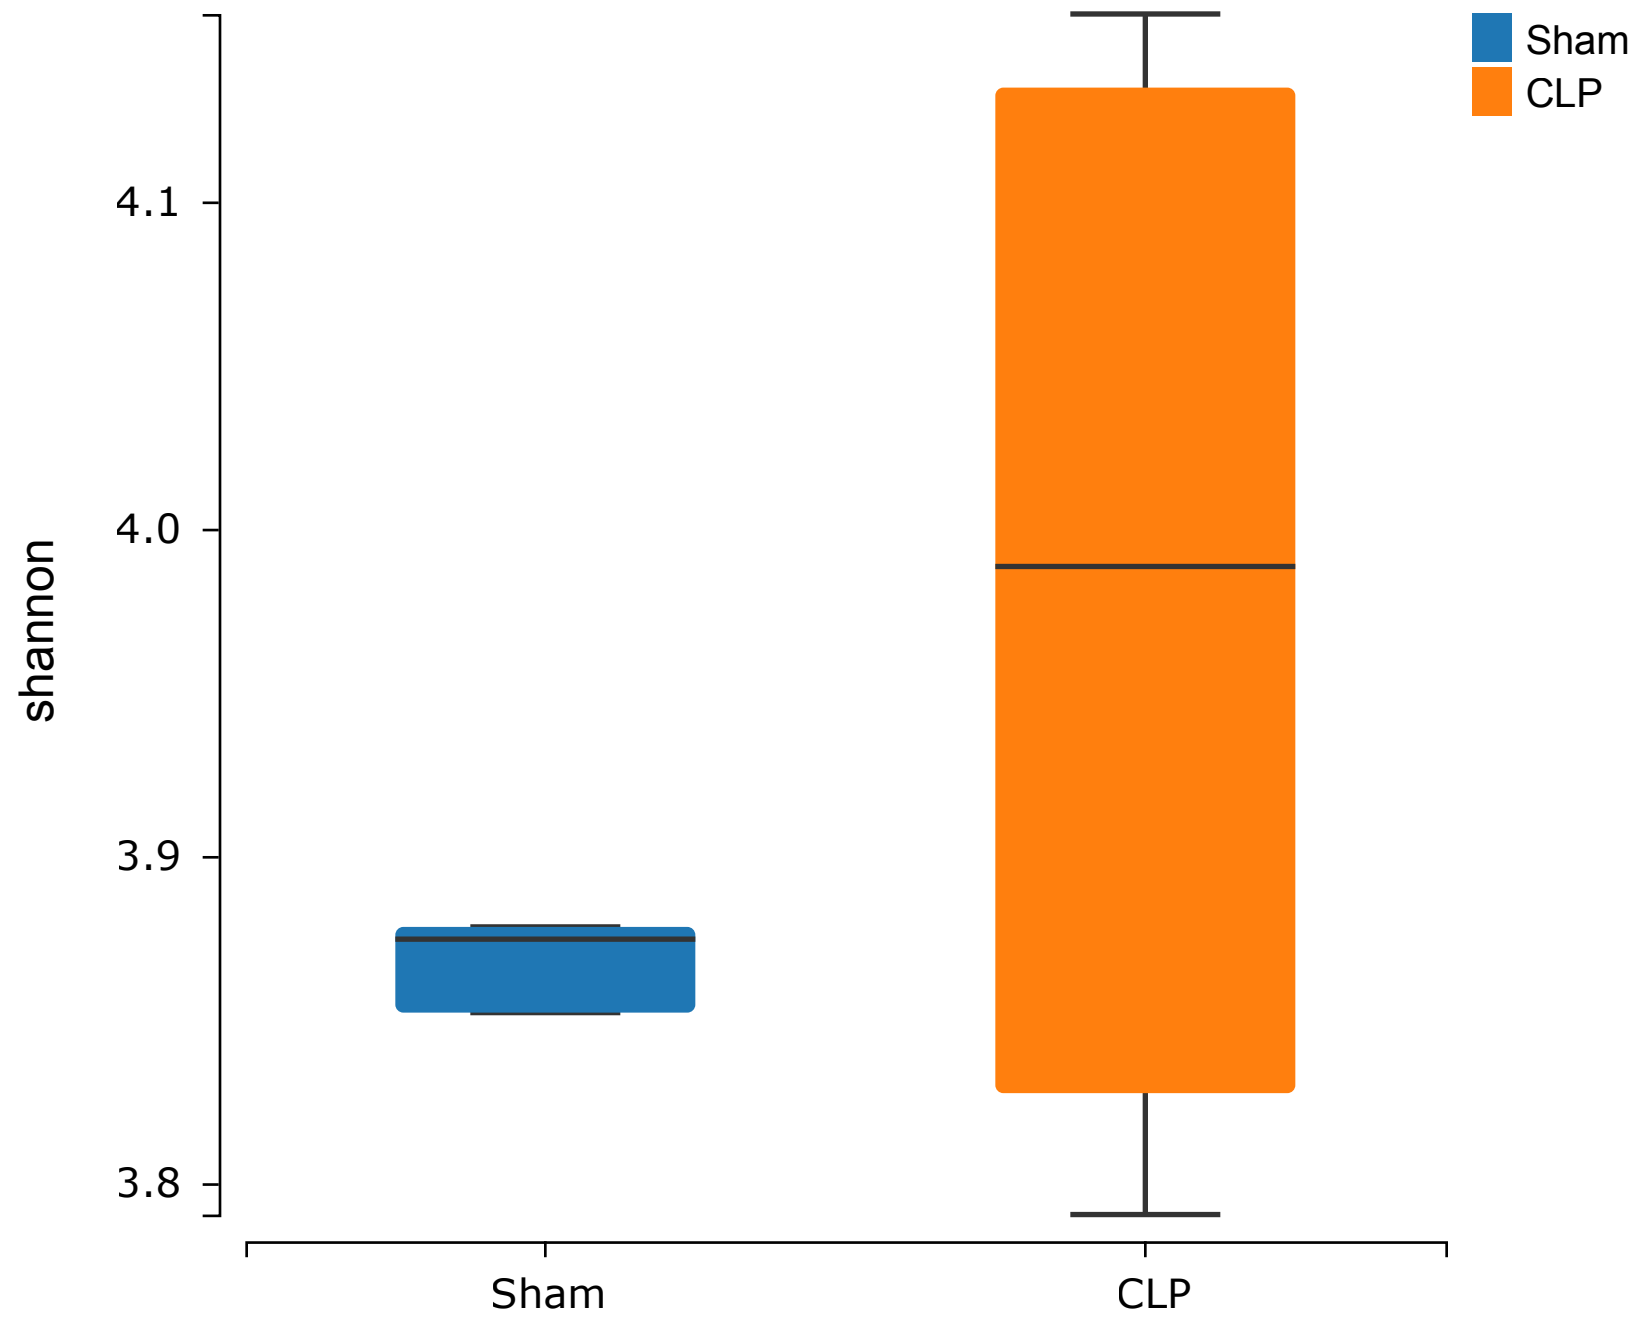

Supplement: Samples_without_C1.zip [file Shannon.pdf › Samples without C1/Shannon.pdf]

P=0.19

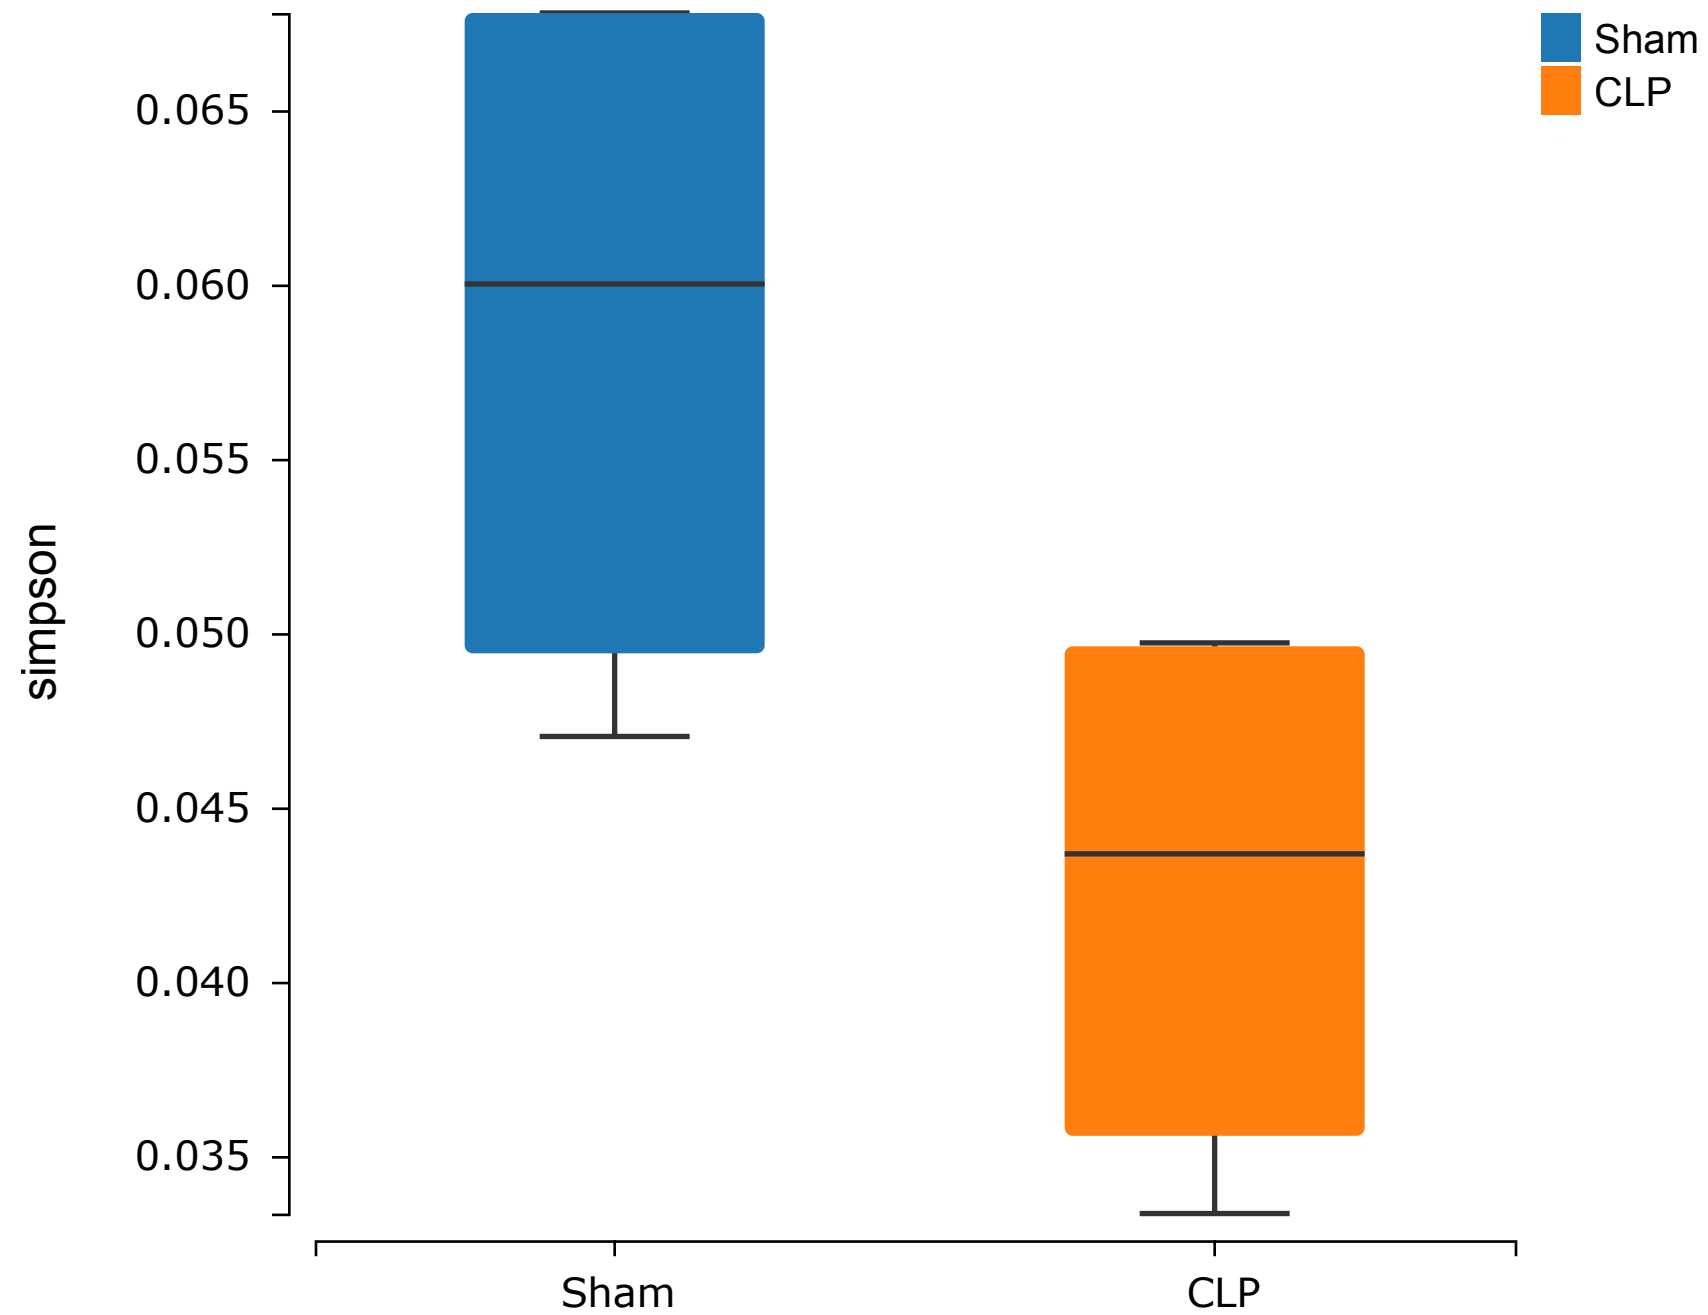

Supplement: Samples_without_C1.zip [file Simpson.pdf › Samples without C1/Simpson.pdf]

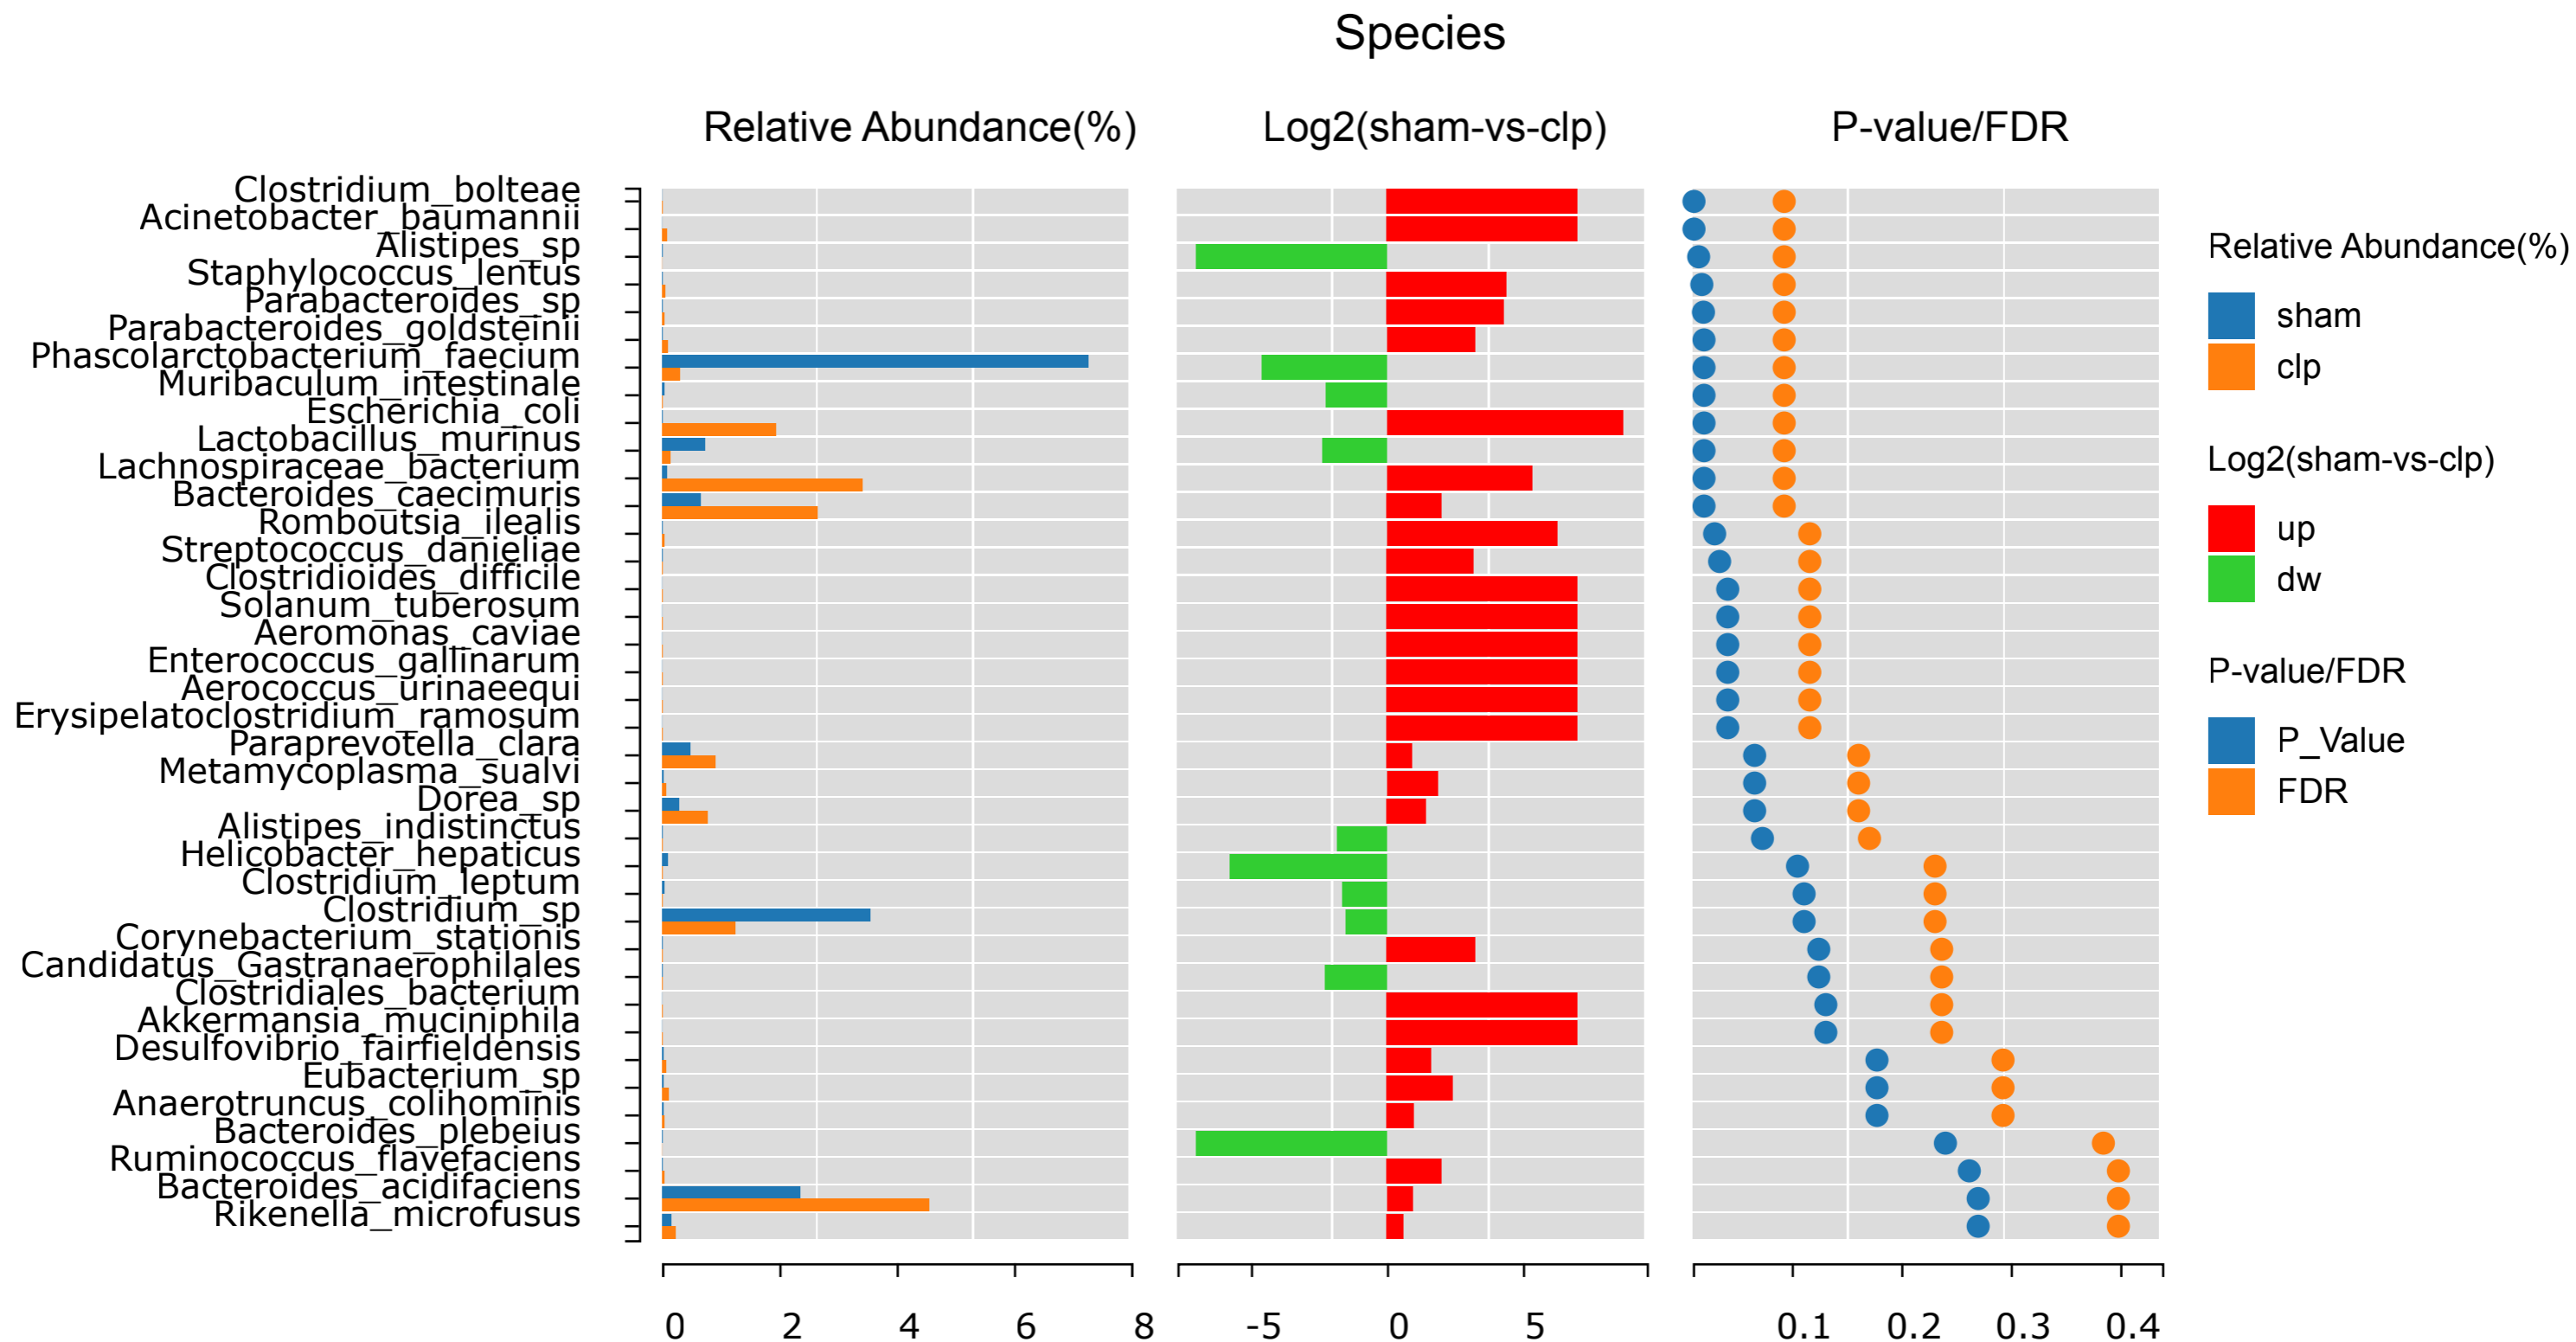

Supplement: Samples_without_C1.zip [file Species.pdf › Samples without C1/Species.pdf]

# Beta-diversity

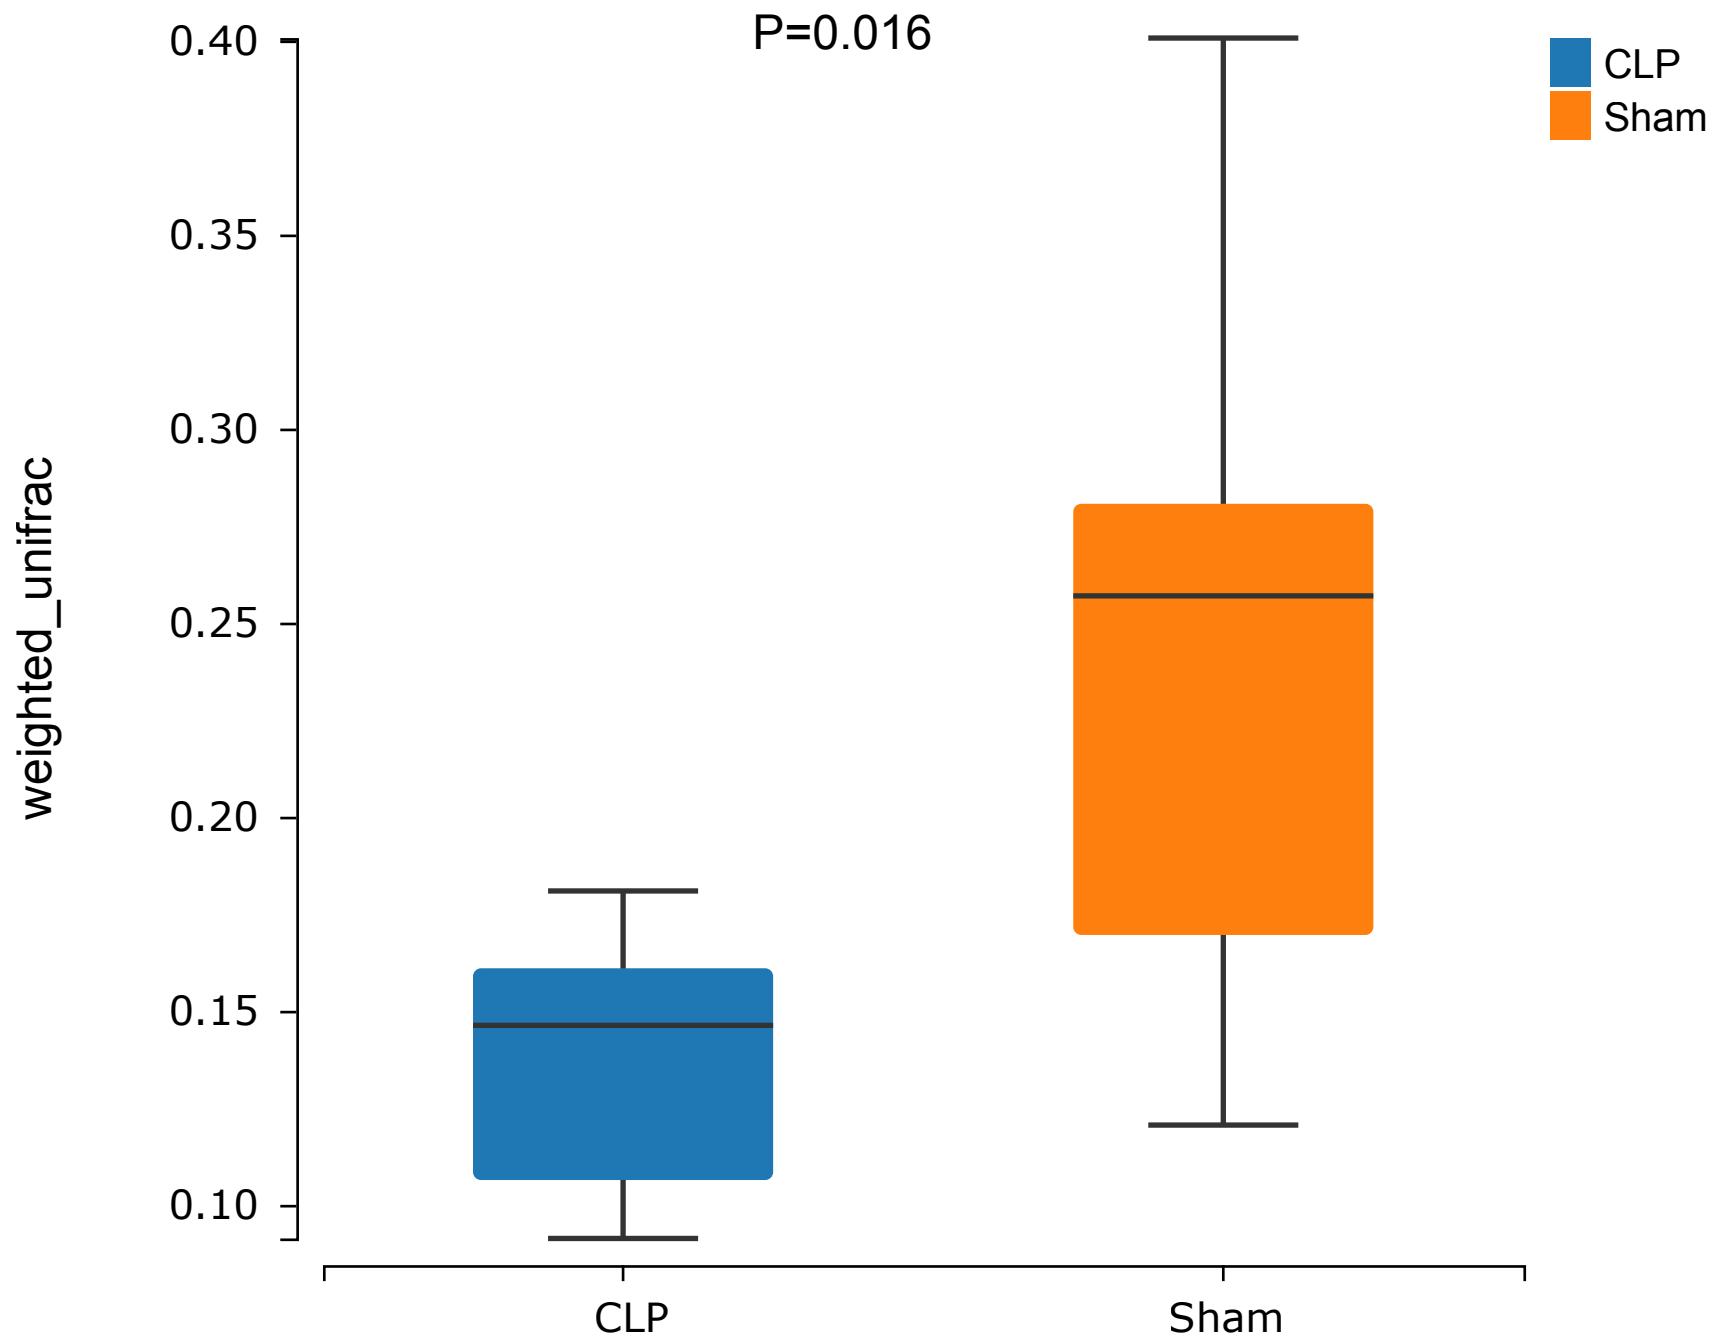

Supplement: Samples_without_C1.zip [file beta-diversity.pdf › Samples without C1/beta-diversity.pdf]
